# Supplementary material for: Hippocampal Atrophy as a Quantitative Trait in a Genome-Wide Association Study Identifying Novel Susceptibility Genes for Alzheimer's Disease
Source: PLoS One. 2009 Aug 7;4(8):e6501. doi: 10.1371/journal.pone.0006501 (PMC2719581; doi:10.1371/journal.pone.0006501)
Supplement: Table S1 — Quantitative trait analysis for the interaction between left and right hippocampi for the SNPs and related genes or chromosomal regions listed in Table 3 of the manuscript. The SNP chromosome, gene, base-pair position, rs number, consequence type and SNP alleles are presented. The p-values for the left and right hippocampi indicate the interaction between SNP and diagnosis in explaining the subjects' degree of hippocampal atrophy. (0.03 MB XLS) [file pone.0006501.s021.xls]

## Sheet: AL157404.18
Chromosome	Gene	Location	SNP	Consequence_type	Allele	RIGHT-P	LEFT-P
1	INTERGENIC	151643610	rs12047833	INTERGENIC	T/C	0.1895	0.0105
1	INTERGENIC	151644127	rs11580467	INTERGENIC	C/T	0.2154	0.0094
1	S100A7L2	151656869	rs4845348	INTRONIC	T/C	0.135	0.0301
1	AL591704.7	151668212	rs3014824	UPSTREAM	A/G	0.4502	0.3021
1	AL591704.7	151668288	rs3006423	UPSTREAM	T/C	0.4103	0.6171
1	S100A7L2	151673185	rs10888560	DOWNSTREAM	G/A	0.2844	0.6545
1	S100A7L2	151675455	rs2026604	DOWNSTREAM	A/G	0.0019	0.0572
1	S100A7L2	151682660	rs2148713	UPSTREAM	C/T	0.0043	0.0592
1	INTERGENIC	151691632	rs6700785	INTERGENIC	T/C	0.0062	0.1022
1	INTERGENIC	151691696	rs3125230	INTERGENIC	T/G	0.0064	0.1094
1	AL157404.18	151698185	rs12132927	INTRONIC	T/C	0.8383	0.628
1	AL157404.18	151700320	rs11205297	UPSTREAM	T/C	0.0877	0.9576
1	INTERGENIC	151707313	rs2986208	INTERGENIC	C/T	0.0013	0.1131
1	INTERGENIC	151708980	rs2986210	INTERGENIC	G/A	0.0282	0.0991
1	INTERGENIC	151712798	rs3014843	INTERGENIC	G/T	0.0539	0.1594
1	INTERGENIC	151719455	rs1555885	INTERGENIC	A/G	0.0078	0.2144
1	INTERGENIC	151722973	rs12025638	INTERGENIC	G/A	0.0794	0.8686
1	INTERGENIC	151726926	rs12759264	INTERGENIC	A/G	0.1276	0.3357
1	INTERGENIC	151746622	rs4845552	INTERGENIC	G/A	5.91x10-6	0.0005
1	S100A5	151776514	rs3795393	NON_SYNONYMOUS_CODING	T/C	0.2808	0.3696
