# Supplementary material for: Hippocampal Atrophy as a Quantitative Trait in a Genome-Wide Association Study Identifying Novel Susceptibility Genes for Alzheimer's Disease
Source: PLoS One. 2009 Aug 7;4(8):e6501. doi: 10.1371/journal.pone.0006501 (PMC2719581; doi:10.1371/journal.pone.0006501)
Supplement: Table S2 — Quantitative trait analysis for the interaction between left and right hippocampi for the SNPs and related genes or chromosomal regions listed in Table 3 of the manuscript. The SNP chromosome, gene, base-pair position, rs number, consequence type and SNP alleles are presented. The p-values for the left and right hippocampi indicate the interaction between SNP and diagnosis in explaining the subjects' degree of hippocampal atrophy. (0.04 MB XLS) [file pone.0006501.s022.xls]

## Sheet: AC026790.5
Chromosome	Gene	Location	SNP	Consequence_type	Allele	RIGHT-P	LEFT-P
5	INTERGENIC	17112369	rs6862915	INTERGENIC	C/T	0.7282	0.1697
5	INTERGENIC	17131295	rs12520008	INTERGENIC	C/T	0.5739	0.9286
5	INTERGENIC	17138379	rs12519960	INTERGENIC	A/G	0.8148	0.7453
5	INTERGENIC	17139107	rs1564599	INTERGENIC	G/A	0.8143	0.7446
5	INTERGENIC	17139303	rs17652001	INTERGENIC	G/A	0.2587	0.8413
5	INTERGENIC	17148269	rs2624435	INTERGENIC	G/A	0.0067	0.3413
5	INTERGENIC	17148350	rs2731798	INTERGENIC	A/G	0.0021	0.0634
5	AC026790.5	17175398	rs2402348	UPSTREAM	C/T	0.0041	0.0269
5	INTERGENIC	17179682	rs297206	INTERGENIC	G/A	0.0003	0.0273
5	INTERGENIC	17180010	rs2731787	INTERGENIC	T/C	0.0012	0.1199
5	INTERGENIC	17182725	rs2896245	INTERGENIC	T/C	0.3623	0.0543
5	INTERGENIC	17185022	rs2652670	INTERGENIC	G/A	0.1478	0.4737
5	INTERGENIC	17190175	rs167214	INTERGENIC	A/G	0.0381	0.5899
5	INTERGENIC	17195224	rs12656050	INTERGENIC	C/T	0.0005	0.0081
5	INTERGENIC	17196610	rs1964566	INTERGENIC	A/G	0.0003	0.0054
5	INTERGENIC	17198142	rs632754	INTERGENIC	G/A	0.0001	0.0097
5	INTERGENIC	17201911	rs682748	INTERGENIC	A/G	8.50x10-6	0.0016
5	INTERGENIC	17204705	rs297169	INTERGENIC	C/T	0.5955	0.7336
5	AC026790.5	17211041	rs297182	UPSTREAM	C/T	0.4664	0.3228
5	AC026790.5	17220535	rs582991	DOWNSTREAM	T/C	0.0447	0.2894
5	BASP1	17225790	rs2402350	INTRONIC	T/C	0.1345	0.3052
5	BASP1	17236851	rs638191	INTRONIC	C/A	0.4734	0.6634
5	BASP1	17236891	rs177053	INTRONIC	C/A	0.2291	0.22
5	BASP1	17245161	rs297191	INTRONIC	G/A	0.1525	0.7624
5	BASP1	17246633	rs585991	INTRONIC	C/T	0.9733	0.4368
5	BASP1	17246856	rs586971	INTRONIC	T/C	0.4967	0.5584
5	BASP1	17250505	rs1542598	INTRONIC	C/T	0.949	0.6157
5	BASP1	17251679	rs2929720	INTRONIC	T/G	0.2784	0.9852
5	BASP1	17253074	rs11952802	INTRONIC	G/A	0.8324	0.9211
5	BASP1	17253302	rs2962359	INTRONIC	A/G	0.3032	0.7171
5	BASP1	17263388	rs12658039	INTRONIC	C/T	0.7843	0.8893
5	BASP1	17264649	rs2929726	INTRONIC	A/G	0.8398	0.8499
5	BASP1	17267901	rs765631	INTRONIC	C/T	0.1181	0.3696
5	BASP1	17272093	rs1540599	INTRONIC	G/T	0.35	0.751
5	BASP1	17278333	rs2242415	INTRONIC	A/C	0.8808	0.5072
5	BASP1	17281908	rs2291236	INTRONIC	C/T	0.3587	0.7735
5	BASP1	17288998	rs298528	INTRONIC	C/T	0.174	0.1776
5	BASP1	17292065	rs298542	INTRONIC	C/T	0.1052	0.2268
5	BASP1	17300021	rs10053617	INTRONIC	T/G	0.1033	0.0872
5	BASP1	17302420	rs953431	INTRONIC	A/G	0.0662	0.0475
5	BASP1	17308026	rs11133892	INTRONIC	A/G	0.6978	0.534
5	BASP1	17308096	rs2937187	INTRONIC	A/C	0.0957	0.1363
5	BASP1	17308515	rs2962365	INTRONIC	T/C	0.1679	0.2928
5	BASP1	17317096	rs1500508	INTRONIC	G/A	0.8752	0.7359
5	BASP1	17321112	rs298595	INTRONIC	G/A	0.1119	0.0937
5	BASP1	17329986	rs298563	DOWNSTREAM	T/C	0.4352	0.3518
5	INTERGENIC	17336265	rs177110	INTERGENIC	A/G	0.1209	0.0437
5	INTERGENIC	17343493	rs298570	INTERGENIC	C/T	0.3786	0.5173
5	INTERGENIC	17351852	rs298564	INTERGENIC	A/G	0.7887	0.4699
5	INTERGENIC	17359790	rs298512	WITHIN_NON_CODING_GENE	T/C	0.1334	0.2028
5	INTERGENIC	17369288	rs16869690	INTERGENIC	A/G	0.1991	0.4173
5	INTERGENIC	17369993	rs298510	INTERGENIC	A/C	0.2629	0.5454
