# Supplementary material for: Hippocampal Atrophy as a Quantitative Trait in a Genome-Wide Association Study Identifying Novel Susceptibility Genes for Alzheimer's Disease
Source: PLoS One. 2009 Aug 7;4(8):e6501. doi: 10.1371/journal.pone.0006501 (PMC2719581; doi:10.1371/journal.pone.0006501)
Supplement: Table S3 — Quantitative trait analysis for the interaction between left and right hippocampi for the SNPs and related genes or chromosomal regions listed in Table 3 of the manuscript. The SNP chromosome, gene, base-pair position, rs number, consequence type and SNP alleles are presented. The p-values for the left and right hippocampi indicate the interaction between SNP and diagnosis in explaining the subjects' degree of hippocampal atrophy. (0.03 MB XLS) [file pone.0006501.s023.xls]

## Sheet: AC022418.5
Chromosome	Gene	Location	SNP	Consequence_type	Allele	RIGHT-P	LEFT-P
5	INTERGENIC	25644484	rs13159537	INTERGENIC	C/T	0.2221	0.2197
5	INTERGENIC	25646520	rs6899062	INTERGENIC	A/C	0.2493	0.1975
5	INTERGENIC	25646864	rs36999	INTERGENIC	T/C	0.3043	0.9065
5	INTERGENIC	25652008	rs2619780	INTERGENIC	C/T	0.4127	0.8604
5	INTERGENIC	25659711	rs7716821	INTERGENIC	A/G	0.4348	0.0534
5	INTERGENIC	25672586	rs10462273	INTERGENIC	C/T	0.7486	0.8629
5	INTERGENIC	25679977	rs7734006	INTERGENIC	T/C	0.6598	0.1881
5	INTERGENIC	25684974	rs1479582	INTERGENIC	T/C	0.818	0.3502
5	INTERGENIC	25685933	rs7723935	INTERGENIC	A/G	0.165	0.0422
5	INTERGENIC	25704591	rs949661	INTERGENIC	A/G	0.9966	0.9948
5	INTERGENIC	25709408	rs248755	INTERGENIC	A/C	0.2137	0.4587
5	INTERGENIC	25710836	rs766800	INTERGENIC	C/T	0.9362	0.9691
5	INTERGENIC	25712363	rs1479571	INTERGENIC	A/C	0.582	0.0405
5	INTERGENIC	25713829	rs9293175	INTERGENIC	A/G	0.2431	0.028
5	INTERGENIC	25716149	rs954478	INTERGENIC	A/G	0.8896	0.734
5	INTERGENIC	25722226	rs1479572	INTERGENIC	C/T	0.3295	0.3746
5	INTERGENIC	25723440	rs187463	INTERGENIC	T/G	0.4059	0.7666
5	INTERGENIC	25724324	rs173585	INTERGENIC	T/G	0.8918	0.7919
5	INTERGENIC	25725454	rs16894710	INTERGENIC	C/T	0.2006	0.445
5	INTERGENIC	25726875	rs13159231	INTERGENIC	G/A	0.7803	0.4484
5	INTERGENIC	25727339	rs11959220	INTERGENIC	A/G	0.924	0.3957
5	INTERGENIC	25728730	rs193741	INTERGENIC	G/A	0.145	0.0419
5	INTERGENIC	25731134	rs10056274	INTERGENIC	T/C	0.4476	0.2734
5	INTERGENIC	25731382	rs9688120	INTERGENIC	C/T	0.6511	0.8725
5	AC022418.5	25735873	rs426089	DOWNSTREAM	C/T	0.5502	0.7254
5	AC022418.5	25736112	rs10520920	DOWNSTREAM	C/A	0.9123	0.6069
5	INTERGENIC	25747485	rs2928179	INTERGENIC	C/A	0.6408	0.516
5	INTERGENIC	25753264	rs400196	INTERGENIC	A/G	0.0854	0.0453
5	INTERGENIC	25758825	rs255041	INTERGENIC	G/A	0.0001	0.0215
5	INTERGENIC	25773621	rs1842249	INTERGENIC	G/A	0.2944	0.0453
5	INTERGENIC	25775740	rs168843	INTERGENIC	G/A	0.0002	0.0415
5	INTERGENIC	25787916	rs1678934	INTERGENIC	A/G	3.82x10-5	0.0086
5	INTERGENIC	25793098	rs4435838	INTERGENIC	A/G	0.4177	0.5761
5	INTERGENIC	25796436	rs7727656	INTERGENIC	G/T	9.32x10-6	0.0049
5	INTERGENIC	25804628	rs12515469	INTERGENIC	G/A	0.6292	0.9832
5	INTERGENIC	25806028	rs969400	INTERGENIC	C/T	0.0455	0.1284
5	INTERGENIC	25810185	rs1479674	INTERGENIC	A/G	0.8599	0.9723
5	INTERGENIC	25815643	rs2199787	INTERGENIC	A/G	0.7348	0.5263
5	INTERGENIC	25822534	rs2972314	INTERGENIC	G/A	0.7924	0.8907
5	INTERGENIC	25826344	rs370277	INTERGENIC	T/G	0.9598	0.9969
5	INTERGENIC	25830584	rs438142	INTERGENIC	C/T	0.5783	0.6407
5	INTERGENIC	25837046	rs423116	INTERGENIC	G/A	0.5812	0.6769
