# Supplementary material for: Hippocampal Atrophy as a Quantitative Trait in a Genome-Wide Association Study Identifying Novel Susceptibility Genes for Alzheimer's Disease
Source: PLoS One. 2009 Aug 7;4(8):e6501. doi: 10.1371/journal.pone.0006501 (PMC2719581; doi:10.1371/journal.pone.0006501)
Supplement: Table S4 — Quantitative trait analysis for the interaction between left and right hippocampi for the SNPs and related genes or chromosomal regions listed in Table 3 of the manuscript. The SNP chromosome, gene, base-pair position, rs number, consequence type and SNP alleles are presented. The p-values for the left and right hippocampi indicate the interaction between SNP and diagnosis in explaining the subjects' degree of hippocampal atrophy. (0.04 MB XLS) [file pone.0006501.s024.xls]

## Sheet: AC104108.3
Chromosome	Gene	Location	SNP	Consequence_type	Allele	RIGHT-P	LEFT-P
5	AP3B1	77444232	rs17191796	INTRONIC	A/G	0.2439	0.5399
5	AP3B1	77447767	rs42360	SYNONYMOUS_CODING	A/G	0.2644	0.4417
5	AP3B1	77473098	rs2052477	INTRONIC	G/A	0.5649	0.1894
5	AP3B1	77477055	rs10755299	INTRONIC	C/A	0.6877	0.1898
5	AP3B1	77509175	rs10428660	INTRONIC	T/C	0.8254	0.2737
5	AP3B1	77528841	rs10039112	INTRONIC	T/G	0.6115	0.4465
5	AP3B1	77536421	rs7733511	INTRONIC	A/G	0.3827	0.393
5	AP3B1	77543915	rs6453374	INTRONIC	G/A	0.8989	0.5773
5	AP3B1	77549929	rs10039931	INTRONIC	C/A	0.4572	0.8377
5	AP3B1	77560400	rs10043750	INTRONIC	C/T	0.5891	0.3782
5	AP3B1	77561551	rs6872407	INTRONIC	T/C	0.3717	0.3846
5	AP3B1	77573127	rs6865361	INTRONIC	A/C	0.6009	0.4477
5	AP3B1	77582552	rs7726585	INTRONIC	A/G	0.1418	0.9967
5	AP3B1	77596133	rs10075003	INTRONIC	C/T	0.1462	0.1019
5	AP3B1	77608195	rs10059285	INTRONIC	C/A	0.0461	0.0863
5	AP3B1	77613462	rs13163558	INTRONIC	G/A	0.0605	0.1058
5	AP3B1	77615837	rs10074129	INTRONIC	T/C	0.0407	0.0791
5	AP3B1	77618327	rs4593248	INTRONIC	G/T	0.1578	0.9264
5	AP3B1	77619784	rs12188788	INTRONIC	C/T	0.0452	0.0824
5	AP3B1	77628680	rs10805919	UPSTREAM	T/C	0.4377	0.0223
5	INTERGENIC	77634610	rs9790855	INTERGENIC	C/T	0.4097	0.2071
5	AC024568.6	77641971	rs4572979	DOWNSTREAM	A/G	0.5483	0.4616
5	AC104108.3	77652915	rs4348192	DOWNSTREAM	G/A	0.0235	0.4754
5	INTERGENIC	77653935	rs10474543	INTERGENIC	C/T	0.1568	0.1107
5	INTERGENIC	77658624	rs7356739	INTERGENIC	A/G	0.2058	0.1119
5	INTERGENIC	77660666	rs4704495	INTERGENIC	T/C	0.0113	0.4733
5	INTERGENIC	77660704	rs4704496	INTERGENIC	C/T	0.0614	0.2272
5	INTERGENIC	77666610	rs6881634	INTERGENIC	G/A	2.31x10-6	0.0564
5	INTERGENIC	77667390	rs4588572	INTERGENIC	A/G	0.0416	0.2469
5	INTERGENIC	77671476	rs4348193	INTERGENIC	T/G	2.87x10-5	0.0247
5	INTERGENIC	77672488	rs13154903	INTERGENIC	T/C	0.2457	0.4185
5	INTERGENIC	77672779	rs9293744	INTERGENIC	T/C	0.0034	0.0095
5	INTERGENIC	77675946	rs11749979	INTERGENIC	T/C	0.291	0.6558
5	INTERGENIC	77681540	rs7722126	INTERGENIC	T/C	0.0022	0.0707
5	INTERGENIC	77683520	rs4267850	INTERGENIC	A/C	0.1985	0.8932
5	SCAMP1	77690583	rs4704506	UPSTREAM	G/T	2.79x10-5	0.0034
5	SCAMP1	77699192	rs10065260	INTRONIC	C/A	0.0173	0.3162
5	SCAMP1	77710302	rs12110158	INTRONIC	C/T	0.0018	0.0728
5	SCAMP1	77731814	rs1346566	INTRONIC	A/C	0.6381	0.564
5	SCAMP1	77749577	rs3822476	INTRONIC	G/T	0.2348	0.7406
5	SCAMP1	77757160	rs1968382	INTRONIC	A/C	0.1451	0.5137
5	SCAMP1	77775106	rs6860842	INTRONIC	C/T	0.9639	0.7168
5	SCAMP1	77777540	rs6873144	INTRONIC	C/T	0.0025	0.0841
5	SCAMP1	77795118	rs10063742	INTRONIC	A/G	0.1761	0.4224
5	SCAMP1	77804699	rs1159930	INTRONIC	T/C	0.0052	0.0772
5	SCAMP1	77816019	rs1428864	DOWNSTREAM	C/T	0.002	0.0315
5	LHFPL2	77822520	rs10514138	INTRONIC	T/G	0.0022	0.0752
5	LHFPL2	77823690	rs11952677	INTRONIC	A/G	0.165	0.6213
5	LHFPL2	77824547	rs16875506	INTRONIC	A/G	0.081	0.3959
5	LHFPL2	77825288	rs7700390	INTRONIC	T/C	0.1008	0.2813
5	LHFPL2	77832467	rs11737914	INTRONIC	T/C	0.6085	0.768
5	LHFPL2	77836839	rs876606	INTRONIC	G/A	0.324	0.8671
5	LHFPL2	77837115	rs876605	INTRONIC	A/G	0.0027	0.0133
5	LHFPL2	77837944	rs751659	INTRONIC	G/A	0.2637	0.1887
5	LHFPL2	77840571	rs6874671	INTRONIC	T/C	0.7595	0.634
5	LHFPL2	77845745	rs11749358	INTRONIC	T/C	0.2953	0.7452
5	LHFPL2	77847064	rs7711188	INTRONIC	C/A	0.1494	0.8717
5	LHFPL2	77850557	rs7713690	INTRONIC	T/C	0.5294	0.7
5	LHFPL2	77855837	rs4704514	INTRONIC	C/T	0.7856	0.9127
5	LHFPL2	77865196	rs6453401	INTRONIC	A/C	0.0202	0.6246
5	LHFPL2	77871110	rs7730720	INTRONIC	T/G	0.031	0.8632
5	LHFPL2	77885683	rs965829	INTRONIC	T/C	0.0718	0.9621
5	LHFPL2	77888754	rs344651	INTRONIC	T/C	0.1031	0.7678
