# Supplementary material for: Hippocampal Atrophy as a Quantitative Trait in a Genome-Wide Association Study Identifying Novel Susceptibility Genes for Alzheimer's Disease
Source: PLoS One. 2009 Aug 7;4(8):e6501. doi: 10.1371/journal.pone.0006501 (PMC2719581; doi:10.1371/journal.pone.0006501)
Supplement: Table S6 — Quantitative trait analysis for the interaction between left and right hippocampi for the SNPs and related genes or chromosomal regions listed in Table 3 of the manuscript. The SNP chromosome, gene, base-pair position, rs number, consequence type and SNP alleles are presented. The p-values for the left and right hippocampi indicate the interaction between SNP and diagnosis in explaining the subjects' degree of hippocampal atrophy. (0.04 MB XLS) [file pone.0006501.s026.xls]

## Sheet: EFNA5
Chromosome	Gene	Location	SNP	Consequence_type	Allele	RIGHT-P	LEFT-P
5	EFNA5	106951468	rs180791	INTRONIC	T/C	0.3953	0.6055
5	EFNA5	106952728	rs9328010	INTRONIC	G/A	0.2987	0.0742
5	EFNA5	106964864	rs3864269	INTRONIC	C/T	0.3127	0.7802
5	EFNA5	106968418	rs2112912	INTRONIC	T/C	0.6266	0.8582
5	EFNA5	106971910	rs12519591	INTRONIC	C/A	0.0562	0.0132
5	EFNA5	106972172	rs26724	INTRONIC	G/A	0.0372	0.0053
5	EFNA5	106973955	rs26728	INTRONIC	C/T	0.9747	0.4825
5	EFNA5	106979256	rs17160255	INTRONIC	G/A	0.0034	0.0049
5	EFNA5	106984342	rs4090594	INTRONIC	A/G	2.67x10-5	0.0004
5	EFNA5	106986857	rs164691	INTRONIC	C/T	0.6045	0.1922
5	EFNA5	106988723	rs164694	INTRONIC	C/T	0.77	0.4504
5	EFNA5	106990248	rs164840	INTRONIC	C/A	0.0015	0.0853
5	EFNA5	106994231	rs352602	INTRONIC	A/G	0.0917	0.021
5	EFNA5	106999467	rs27550	INTRONIC	C/A	0.5888	0.3089
5	EFNA5	107007151	rs35419	INTRONIC	A/G	0.0862	0.0165
5	EFNA5	107008734	rs149382	INTRONIC	T/C	0.08	0.0179
5	EFNA5	107010459	rs10074258	INTRONIC	C/T	2.28x10-7	7.92x10-6
5	EFNA5	107012067	rs26731	INTRONIC	T/C	0.0004	0.0363
5	EFNA5	107012707	rs17160324	INTRONIC	G/A	0.0002	0.0001
5	EFNA5	107018930	rs7732162	INTRONIC	C/T	0.0376	0.0193
5	EFNA5	107038100	rs1490827	UPSTREAM	A/G	0.0027	0.0198
5	INTERGENIC	107039458	rs6887589	INTERGENIC	A/G	0.0123	0.033
5	INTERGENIC	107044019	rs17351329	INTERGENIC	A/G	0.3063	0.3162
5	INTERGENIC	107048753	rs873136	INTERGENIC	T/G	0.0015	0.0161
5	INTERGENIC	107051555	rs1304902	INTERGENIC	T/C	0.569	0.4237
5	INTERGENIC	107052557	rs10055714	INTERGENIC	A/G	0.0027	0.0556
5	INTERGENIC	107059960	rs13159331	INTERGENIC	G/A	0.0007	0.0526
5	INTERGENIC	107061805	rs4957709	INTERGENIC	T/C	0.7907	0.3077
5	INTERGENIC	107063926	rs1490839	INTERGENIC	G/A	0.0014	0.0068
5	INTERGENIC	107065959	rs1352726	INTERGENIC	T/C	0.0631	0.1888
5	INTERGENIC	107067449	rs1490838	INTERGENIC	G/A	0.0043	0.0009
5	INTERGENIC	107068341	rs12654281	INTERGENIC	C/T	3.94x10-7	2.13x10-5
5	INTERGENIC	107074216	rs6864800	INTERGENIC	C/A	4.71x10-5	0.0005
5	INTERGENIC	107074597	rs12657273	INTERGENIC	T/C	9.25x10-6	0.0001
5	INTERGENIC	107079841	rs154167	INTERGENIC	A/G	0.0153	0.0145
5	AC024587.5	107094204	rs154189	DOWNSTREAM	A/G	0.0002	0.0068
5	AC024587.5	107094430	rs154188	DOWNSTREAM	A/G	0.0016	0.0187
5	AC024587.5	107096477	rs154186	DOWNSTREAM	C/A	0.0009	0.0162
5	AC024587.5	107099404	rs35551	UPSTREAM	G/A	0.4619	0.2798
5	AC024587.5	107101392	rs2411044	UPSTREAM	G/A	0.0011	0.0464
5	AC024587.5	107101705	rs35550	UPSTREAM	C/T	0.0004	0.0093
5	INTERGENIC	107107224	rs154174	INTERGENIC	C/T	0.0004	0.0056
5	INTERGENIC	107107726	rs10075132	INTERGENIC	A/G	0.5887	0.5941
5	INTERGENIC	107109323	rs6892045	INTERGENIC	G/A	0.1268	0.3582
5	INTERGENIC	107109377	rs35521	INTERGENIC	G/A	0.0307	0.2159
5	INTERGENIC	107111238	rs173644	INTERGENIC	C/T	0.0049	0.0177
5	INTERGENIC	107114161	rs1990918	INTERGENIC	G/A	0.0489	0.1907
5	INTERGENIC	107115249	rs9328017	INTERGENIC	C/A	0.051	0.1878
5	INTERGENIC	107119762	rs6873048	INTERGENIC	A/G	0.0035	0.0293
5	INTERGENIC	107120197	rs6882236	INTERGENIC	T/C	0.0055	0.0284
5	INTERGENIC	107121047	rs10052705	INTERGENIC	A/G	0.4389	0.2447
5	INTERGENIC	107121389	rs17160517	INTERGENIC	T/G	0.4389	0.2447
5	INTERGENIC	107130058	rs35544	INTERGENIC	G/A	0.1576	0.2364
5	INTERGENIC	107136376	rs249979	INTERGENIC	C/T	0.0208	0.2439
5	INTERGENIC	107138008	rs249981	INTERGENIC	T/C	0.0864	0.4007
