# Supplementary material for: Hippocampal Atrophy as a Quantitative Trait in a Genome-Wide Association Study Identifying Novel Susceptibility Genes for Alzheimer's Disease
Source: PLoS One. 2009 Aug 7;4(8):e6501. doi: 10.1371/journal.pone.0006501 (PMC2719581; doi:10.1371/journal.pone.0006501)
Supplement: Table S7 — Quantitative trait analysis for the interaction between left and right hippocampi for the SNPs and related genes or chromosomal regions listed in Table 3 of the manuscript. The SNP chromosome, gene, base-pair position, rs number, consequence type and SNP alleles are presented. The p-values for the left and right hippocampi indicate the interaction between SNP and diagnosis in explaining the subjects' degree of hippocampal atrophy. (0.04 MB XLS) [file pone.0006501.s027.xls]

## Sheet: AC096553.4
Chromosome	Gene	Location	SNP	Consequence_type	Allele	LEFT-P	RIGHT-P
7	INTERGENIC	9425020	rs2350835	INTERGENIC	G/T	0.3866	0.5917
7	INTERGENIC	9453661	rs11972100	INTERGENIC	G/T	0.0082	0.1045
7	INTERGENIC	9453934	rs2713328	INTERGENIC	C/A	0.5662	0.6129
7	INTERGENIC	9457316	rs13228415	INTERGENIC	A/G	0.0298	0.0633
7	INTERGENIC	9463019	rs10248109	INTERGENIC	G/A	0.0496	0.0331
7	INTERGENIC	9481054	rs7782202	INTERGENIC	A/C	0.3426	0.7152
7	INTERGENIC	9482063	rs4236418	INTERGENIC	C/T	0.3042	0.2909
7	INTERGENIC	9483628	rs7797026	INTERGENIC	T/C	0.1918	0.1456
7	INTERGENIC	9483963	rs2251806	INTERGENIC	A/G	0.837	0.4031
7	INTERGENIC	9485047	rs2709097	INTERGENIC	A/G	0.7538	0.328
7	INTERGENIC	9488459	rs2350846	INTERGENIC	T/C	0.6738	0.8644
7	INTERGENIC	9497068	rs2709091	INTERGENIC	C/T	0.8854	0.3654
7	INTERGENIC	9500649	rs2350850	INTERGENIC	T/C	0.4479	0.4936
7	INTERGENIC	9501321	rs6978795	INTERGENIC	G/A	0.0171	0.0789
7	INTERGENIC	9503726	rs9918582	INTERGENIC	G/A	4.72x10-5	0.0142
7	INTERGENIC	9505804	rs9918508	INTERGENIC	C/T	8.82x10-6	0.0067
7	INTERGENIC	9508524	rs2709064	INTERGENIC	G/A	0.3121	0.4775
7	INTERGENIC	9508840	rs2713344	INTERGENIC	A/G	0.2471	0.2714
7	INTERGENIC	9519740	rs2350853	INTERGENIC	G/T	0.2275	0.4458
7	INTERGENIC	9521207	rs10499358	INTERGENIC	C/T	0.0082	0.1749
7	INTERGENIC	9523080	rs2350862	INTERGENIC	A/C	0.1512	0.2602
7	INTERGENIC	9527139	rs10230633	INTERGENIC	A/G	0.1891	0.3688
7	INTERGENIC	9529436	rs10252713	INTERGENIC	G/T	0.2818	0.4064
7	INTERGENIC	9534049	rs1505310	INTERGENIC	G/A	0.2576	0.2629
7	INTERGENIC	9537527	rs6463923	INTERGENIC	A/G	0.1274	0.2324
7	INTERGENIC	9538623	rs17161716	INTERGENIC	T/C	0.8244	0.7415
7	INTERGENIC	9543215	rs7796116	INTERGENIC	T/C	0.0018	0.0303
7	INTERGENIC	9543940	rs1354615	INTERGENIC	A/G	0.0067	0.144
7	INTERGENIC	9549438	rs968682	INTERGENIC	C/T	0.1616	0.2495
7	INTERGENIC	9550985	rs2709014	INTERGENIC	T/G	0.8926	0.7831
7	INTERGENIC	9553450	rs2709012	INTERGENIC	T/C	0.3175	0.4782
7	INTERGENIC	9554061	rs10216270	INTERGENIC	T/C	0.7893	0.8921
7	INTERGENIC	9558193	rs1505335	INTERGENIC	C/T	0.0724	0.3934
7	INTERGENIC	9560331	rs6964683	INTERGENIC	C/T	0.9109	0.7779
7	INTERGENIC	9563589	rs2657277	INTERGENIC	T/C	0.0657	0.2188
7	INTERGENIC	9564338	rs2709004	INTERGENIC	G/A	0.0785	0.2824
7	INTERGENIC	9565990	rs17161756	INTERGENIC	A/G	0.0511	0.3632
7	INTERGENIC	9573664	rs6975367	INTERGENIC	T/C	0.2295	0.5782
7	INTERGENIC	9581086	rs2938841	INTERGENIC	C/T	0.0331	0.177
7	INTERGENIC	9582668	rs16876126	INTERGENIC	T/C	0.0902	0.3844
7	INTERGENIC	9582933	rs2047948	INTERGENIC	A/C	0.1554	0.2703
7	INTERGENIC	9583505	rs17161791	INTERGENIC	T/C	0.3472	0.5942
7	INTERGENIC	9586749	rs1566917	INTERGENIC	A/G	0.2392	0.5386
7	INTERGENIC	9589818	rs2708997	INTERGENIC	T/C	0.0347	0.1729
7	INTERGENIC	9593682	rs2657224	INTERGENIC	T/G	0.3445	0.7599
7	INTERGENIC	9595470	rs2657231	INTERGENIC	A/G	0.2496	0.3318
7	INTERGENIC	9596298	rs2657232	INTERGENIC	T/C	0.2417	0.3182
7	INTERGENIC	9599702	rs2657237	INTERGENIC	T/C	0.688	0.9477
7	INTERGENIC	9608974	rs2709050	INTERGENIC	A/G	0.026	0.2021
7	INTERGENIC	9609808	rs1354606	INTERGENIC	T/C	0.2455	0.5321
7	INTERGENIC	9611287	rs3857763	INTERGENIC	C/T	0.3745	0.9214
7	AC096553.4	9618076	rs4640976	UPSTREAM	G/A	0.0432	0.3773
7	AC096553.4	9618805	rs1032873	UPSTREAM	C/T	0.0182	0.2486
7	INTERGENIC	9629332	rs10085496	INTERGENIC	A/G	0.5207	0.2464
7	INTERGENIC	9631268	rs4725217	INTERGENIC	A/G	0.2986	0.348
7	INTERGENIC	9636095	rs11978724	INTERGENIC	G/A	0.9843	0.5752
7	INTERGENIC	9641586	rs2202475	INTERGENIC	C/A	0.8047	0.8135
7	INTERGENIC	9647047	rs1394775	INTERGENIC	C/T	0.0857	0.1502
7	INTERGENIC	9649521	rs10464249	INTERGENIC	G/A	0.5464	0.0302
7	INTERGENIC	9653892	rs1394777	INTERGENIC	C/T	0.4611	0.1241
7	INTERGENIC	9655949	rs1876045	INTERGENIC	T/C	0.441	0.1623
7	INTERGENIC	9656228	rs1505340	INTERGENIC	A/G	0.3318	0.1429
7	INTERGENIC	9659607	rs4273764	INTERGENIC	T/C	0.6987	0.3469
7	INTERGENIC	9660834	rs10255895	INTERGENIC	G/T	0.7489	0.3243
7	INTERGENIC	9661361	rs7796507	INTERGENIC	T/C	0.7472	0.3131
7	INTERGENIC	9671257	rs11767294	INTERGENIC	T/G	0.1037	0.2091
7	INTERGENIC	9674747	rs6954232	INTERGENIC	C/T	0.818	0.9579
7	INTERGENIC	9678184	rs10224816	INTERGENIC	T/C	0.6132	0.9401
7	INTERGENIC	9678651	rs957270	INTERGENIC	C/T	0.1265	0.2296
7	INTERGENIC	9690241	rs7805053	INTERGENIC	C/A	0.6248	0.8225
7	INTERGENIC	9700848	rs320794	INTERGENIC	A/G	0.1809	0.5136
7	INTERGENIC	9702831	rs320799	INTERGENIC	C/T	0.5704	0.8369
7	INTERGENIC	9704036	rs6976386	INTERGENIC	T/C	0.8887	0.6544
7	INTERGENIC	9706162	rs12056222	INTERGENIC	A/C	0.3848	0.6828
7	INTERGENIC	9710329	rs535495	INTERGENIC	G/A	0.2414	0.2529
7	INTERGENIC	9715322	rs320777	INTERGENIC	A/G	0.4232	0.8536
7	INTERGENIC	9715475	rs320778	INTERGENIC	G/A	0.7507	0.1821
7	INTERGENIC	9724280	rs320788	INTERGENIC	G/T	0.7919	0.1513
