# Supplementary material for: Hippocampal Atrophy as a Quantitative Trait in a Genome-Wide Association Study Identifying Novel Susceptibility Genes for Alzheimer's Disease
Source: PLoS One. 2009 Aug 7;4(8):e6501. doi: 10.1371/journal.pone.0006501 (PMC2719581; doi:10.1371/journal.pone.0006501)
Supplement: Table S8 — Quantitative trait analysis for the interaction between left and right hippocampi for the SNPs and related genes or chromosomal regions listed in Table 3 of the manuscript. The SNP chromosome, gene, base-pair position, rs number, consequence type and SNP alleles are presented. The p-values for the left and right hippocampi indicate the interaction between SNP and diagnosis in explaining the subjects' degree of hippocampal atrophy. (0.04 MB XLS) [file pone.0006501.s028.xls]

## Sheet: IKZF1
Chromosome	Gene	Location	SNP	Consequence_type	Allele	LEFT-P	RIGHT-P
7	INTERGENIC	50114262	rs1870029	INTERGENIC	G/A	0.7847	0.9716
7	INTERGENIC	50118424	rs6583428	INTERGENIC	G/A	0.6351	0.8259
7	INTERGENIC	50123056	rs1585140	INTERGENIC	A/-/G	0.4652	0.7524
7	INTERGENIC	50123300	rs1396279	INTERGENIC	C/T	0.9288	0.4274
7	INTERGENIC	50128145	rs2366032	INTERGENIC	T/C	0.8537	0.2434
7	INTERGENIC	50130735	rs1379175	INTERGENIC	A/G	0.7969	0.9262
7	INTERGENIC	50132237	rs28508243	INTERGENIC	T/C	0.8537	0.2434
7	AC020743.7	50148762	rs7805656	INTRONIC	T/C	0.8719	0.5856
7	AC020743.7	50151518	rs1456908	INTRONIC	C/T	0.8015	0.3325
7	AC020743.7	50152625	rs10234768	INTRONIC	T/C	0.8355	0.7231
7	AC020743.7	50163648	rs4917010	INTRONIC	T/G	0.8784	0.8348
7	AC020743.7	50165466	rs17633812	INTRONIC	T/C	0.3903	0.7477
7	INTERGENIC	50175595	rs1020718	INTERGENIC	C/T	0.3889	0.2283
7	INTERGENIC	50177586	rs10246184	INTERGENIC	G/A	0.6721	0.3245
7	INTERGENIC	50181745	rs882034	INTERGENIC	G/A	0.8909	0.4714
7	INTERGENIC	50188396	rs1037674	INTERGENIC	G/T	0.9625	0.9515
7	INTERGENIC	50193046	rs897694	INTERGENIC	C/A	0.7464	0.4531
7	INTERGENIC	50193537	rs2045369	INTERGENIC	C/T	0.9648	0.4301
7	INTERGENIC	50195937	rs7805803	INTERGENIC	G/A	0.0463	0.0077
7	INTERGENIC	50199244	rs921916	INTERGENIC	C/T	0.4228	0.3254
7	INTERGENIC	50205347	rs874355	INTERGENIC	G/A	0.8737	0.7142
7	INTERGENIC	50207010	rs1379183	INTERGENIC	A/C	0.7195	0.2747
7	INTERGENIC	50207629	rs6957965	INTERGENIC	T/C	0.5389	0.1806
7	INTERGENIC	50212358	rs921911	INTERGENIC	A/G	0.4427	0.7651
7	INTERGENIC	50214034	rs1037676	INTERGENIC	A/C	0.7068	0.8783
7	INTERGENIC	50219559	rs11761913	INTERGENIC	C/T	0.5058	0.8882
7	INTERGENIC	50220117	rs4917125	INTERGENIC	A/G	0.8357	0.7921
7	INTERGENIC	50220900	rs17133733	INTERGENIC	T/C	0.7228	0.2341
7	INTERGENIC	50226615	rs2168587	INTERGENIC	G/A	0.0457	0.0063
7	INTERGENIC	50240218	rs1456893	INTERGENIC	G/A	1.13x10-5	0.0025
7	INTERGENIC	50240560	rs2124799	INTERGENIC	C/T	8.87x10-6	0.0015
7	INTERGENIC	50249131	rs12669163	INTERGENIC	A/C	0.0011	0.0157
7	INTERGENIC	50275007	rs1456896	INTERGENIC	C/T	7.11x10-5	0.0071
7	INTERGENIC	50276409	rs4917014	INTERGENIC	T/G	0.318	0.3677
7	INTERGENIC	50282351	rs9649739	INTERGENIC	T/C	0.0004	0.0713
7	INTERGENIC	50283898	rs10276619	INTERGENIC	G/A	3.06x10-6	0.007
7	INTERGENIC	50291272	rs1026421	INTERGENIC	T/C	0.0004	0.0611
7	INTERGENIC	50299945	rs963594	INTERGENIC	C/T	0.0012	0.0899
7	INTERGENIC	50304009	rs4917016	INTERGENIC	T/C	0.0008	0.0503
7	IKZF1	50316680	rs7781977	INTRONIC	T/C	0.6368	0.5985
7	IKZF1	50323241	rs7789913	INTRONIC	T/C	0.3152	0.9224
7	IKZF1	50332228	rs6583440	INTRONIC	A/G	0.3821	0.3655
7	IKZF1	50337181	rs10251980	INTRONIC	G/A	0.4157	0.3391
7	IKZF1	50385016	rs11765988	INTRONIC	A/G	0.8828	0.5838
7	IKZF1	50385736	rs7785321	INTRONIC	C/T	0.8243	0.8189
7	IKZF1	50386000	rs7779749	INTRONIC	A/C	0.7461	0.8952
7	IKZF1	50392785	rs6963357	INTRONIC	A/G	0.8474	0.9
7	IKZF1	50395939	rs12718598	INTRONIC	T/C	0.6411	0.471
7	IKZF1	50403271	rs12669559	INTRONIC	T/G	0.3507	0.4696
7	IKZF1	50406214	rs7780012	INTRONIC	G/T	0.7688	0.7568
7	IKZF1	50410220	rs7809377	INTRONIC	G/A	0.2862	0.9731
7	IKZF1	50422230	rs6962370	INTRONIC	A/G	0.7626	0.6359
7	IKZF1	50425940	rs6954833	INTRONIC	G/A	0.9538	0.39
7	IKZF1	50427590	rs6964823	INTRONIC	G/A	0.3492	0.4624
7	IKZF1	50427702	rs7797772	INTRONIC	G/A	0.7819	0.8433
