# Supplementary material for: Hippocampal Atrophy as a Quantitative Trait in a Genome-Wide Association Study Identifying Novel Susceptibility Genes for Alzheimer's Disease
Source: PLoS One. 2009 Aug 7;4(8):e6501. doi: 10.1371/journal.pone.0006501 (PMC2719581; doi:10.1371/journal.pone.0006501)
Supplement: Table S9 — Quantitative trait analysis for the interaction between left and right hippocampi for the SNPs and related genes or chromosomal regions listed in Table 3 of the manuscript. The SNP chromosome, gene, base-pair position, rs number, consequence type and SNP alleles are presented. The p-values for the left and right hippocampi indicate the interaction between SNP and diagnosis in explaining the subjects' degree of hippocampal atrophy. (0.04 MB XLS) [file pone.0006501.s029.xls]

## Sheet: MAGI2
Chromosome	Gene	Location	SNP	Consequence_type	Allele	LEFT-P	RIGHT-P
7	MAGI2	77942453	rs7807844	INTRONIC	G/A	0.2442	0.6315
7	MAGI2	77943007	rs12705478	INTRONIC	T/C	0.2284	0.7447
7	MAGI2	77943120	rs10485898	INTRONIC	A/C	0.4447	0.9284
7	MAGI2	77946239	rs6951193	INTRONIC	A/G	0.0415	0.0929
7	MAGI2	77946590	rs9641412	INTRONIC	A/G	0.1107	0.1524
7	MAGI2	77949920	rs7784896	INTRONIC	G/A	0.1413	0.2359
7	MAGI2	77952597	rs12155286	INTRONIC	A/G	0.0538	0.217
7	MAGI2	77953177	rs13227908	INTRONIC	C/T	0.0497	0.4253
7	MAGI2	77954122	rs7779732	INTRONIC	C/A	0.9542	0.6414
7	MAGI2	77955026	rs6974799	INTRONIC	T/C	0.015	0.178
7	MAGI2	77955323	rs7784056	INTRONIC	G/T	0.0123	0.1369
7	MAGI2	77955586	rs10156060	INTRONIC	A/C	0.0828	0.5691
7	MAGI2	77956152	rs759333	INTRONIC	C/A	0.9821	0.8455
7	MAGI2	77956782	rs1548867	INTRONIC	A/G	0.6923	0.902
7	MAGI2	77957135	rs1990577	INTRONIC	A/C	0.0016	0.0096
7	MAGI2	77957716	rs17150898	INTRONIC	A/C	0.6625	0.3663
7	MAGI2	77959394	rs7805441	INTRONIC	C/T	0.0275	0.0099
7	MAGI2	77959526	rs7804616	INTRONIC	G/T	0.0459	0.1282
7	MAGI2	77960142	rs7809117	INTRONIC	G/A	0.0948	0.5361
7	MAGI2	77960552	rs10268479	INTRONIC	C/T	0.1009	0.2363
7	MAGI2	77972800	rs4730342	INTRONIC	C/T	0.0046	0.0066
7	MAGI2	77976478	rs4730345	INTRONIC	G/A	0.0578	0.013
7	MAGI2	77976650	rs6968852	INTRONIC	G/A	0.0284	0.1733
7	MAGI2	77976913	rs1030012	INTRONIC	T/G	0.8846	0.7217
7	MAGI2	77977517	rs1030015	INTRONIC	G/T	0.0294	0.0108
7	MAGI2	77979596	rs6947977	INTRONIC	C/T	0.0722	0.1751
7	MAGI2	77983592	rs2362630	INTRONIC	T/C	0.1771	0.0402
7	MAGI2	77985030	rs10246978	INTRONIC	C/T	0.0206	0.0272
7	MAGI2	77985161	rs3801362	INTRONIC	A/G	0.9104	0.8301
7	MAGI2	77986916	rs9691998	INTRONIC	A/G	0.2043	0.0477
7	MAGI2	77987000	rs725555	INTRONIC	T/C	0.0288	0.1928
7	MAGI2	77989305	rs17150949	INTRONIC	T/C	0.6752	0.6812
7	MAGI2	77990097	rs6959536	INTRONIC	A/C	0.0129	0.0053
7	MAGI2	77991955	rs7806320	INTRONIC	T/C	0.3622	0.2794
7	MAGI2	77993275	rs10239917	INTRONIC	T/C	0.0034	0.0042
7	MAGI2	77996408	rs12666870	INTRONIC	T/C	0.5169	0.936
7	MAGI2	77996545	rs10271370	INTRONIC	C/A	0.0396	0.3542
7	MAGI2	77998184	rs6466265	INTRONIC	A/G	0.0282	0.2319
7	MAGI2	78000041	rs12705545	INTRONIC	T/C	0.0751	0.0356
7	MAGI2	78001237	rs2885563	INTRONIC	T/C	0.4419	0.841
7	MAGI2	78008524	rs727200	INTRONIC	A/G	0.2493	0.0763
7	MAGI2	78011339	rs10953601	INTRONIC	G/A	0.0178	0.0048
7	MAGI2	78013798	rs2192651	INTRONIC	T/G	0.0243	0.1676
7	MAGI2	78013913	rs11525066	INTRONIC	G/A	2.96x10-6	1.37x10-5
7	MAGI2	78014692	rs12705567	INTRONIC	C/T	0.2824	0.9649
7	MAGI2	78014933	rs763451	INTRONIC	G/A	0.9873	0.5469
7	MAGI2	78018456	rs879304	INTRONIC	A/G	0.4511	0.4906
7	MAGI2	78020508	rs4730378	INTRONIC	G/A	0.5627	0.7843
7	MAGI2	78023824	rs2192656	INTRONIC	G/A	0.9838	0.9633
7	MAGI2	78023891	rs2192658	INTRONIC	C/T	0.6473	0.4292
7	MAGI2	78025701	rs2362635	INTRONIC	T/C	0.2587	0.5548
7	MAGI2	78028542	rs12705589	INTRONIC	A/G	0.3203	0.5239
7	MAGI2	78030279	rs17438461	INTRONIC	A/G	0.3981	0.489
7	MAGI2	78031372	rs10230681	INTRONIC	T/C	0.9723	0.5759
7	MAGI2	78031567	rs1473169	INTRONIC	C/A	0.7619	0.3977
7	MAGI2	78052766	rs2362640	INTRONIC	G/T	0.0221	0.0171
7	MAGI2	78053282	rs11979133	INTRONIC	C/T	0.8847	0.3695
7	MAGI2	78054773	rs319864	INTRONIC	T/C	0.5368	0.2141
7	MAGI2	78055762	rs17439102	INTRONIC	C/T	0.8053	0.9355
7	MAGI2	78057025	rs7779620	INTRONIC	T/G	0.7127	0.4129
