# Supplementary material for: Hippocampal Atrophy as a Quantitative Trait in a Genome-Wide Association Study Identifying Novel Susceptibility Genes for Alzheimer's Disease
Source: PLoS One. 2009 Aug 7;4(8):e6501. doi: 10.1371/journal.pone.0006501 (PMC2719581; doi:10.1371/journal.pone.0006501)
Supplement: Table S11 — Quantitative trait analysis for the interaction between left and right hippocampi for the SNPs and related genes or chromosomal regions listed in Table 3 of the manuscript. The SNP chromosome, gene, base-pair position, rs number, consequence type and SNP alleles are presented. The p-values for the left and right hippocampi indicate the interaction between SNP and diagnosis in explaining the subjects' degree of hippocampal atrophy. (0.04 MB XLS) [file pone.0006501.s031.xls]

## Sheet: PRUNE2
Chromosome	Gene	Location	SNP	Consequence_type	Allele	LEFT-P	RIGHT-P
9	KIAA0367	78493863	rs520365	INTRONIC	T/G	0.4072	0.2889
9	KIAA0367	78500251	rs505034	INTRONIC	G/A	0.4765	0.3067
9	KIAA0367	78500475	rs506965	INTRONIC	C/A	0.4248	0.2405
9	KIAA0367	78505220	rs620321	INTRONIC	C/T	0.9885	0.3445
9	KIAA0367	78508187	rs4745571	NON_SYNONYMOUS_CODING	T/C	0.8776	0.2217
9	KIAA0367	78508497	rs561970	NON_SYNONYMOUS_CODING	T/C	0.7955	0.6685
9	KIAA0367	78508741	rs620985	SYNONYMOUS_CODING	A/G	0.2559	0.0901
9	KIAA0367	78508818	rs620552	NON_SYNONYMOUS_CODING	A/G	0.8403	0.5416
9	KIAA0367	78509915	rs3739524	NON_SYNONYMOUS_CODING	T/G	0.7934	0.3728
9	KIAA0367	78514259	rs12238013	SYNONYMOUS_CODING	A/G	0.8143	0.742
9	KIAA0367	78517936	rs2277155	INTRONIC	C/T	0.9301	0.6658
9	KIAA0367	78522652	rs7034735	UPSTREAM	A/C	0.5655	0.6877
9	KIAA0367	78522876	rs890150	UPSTREAM	A/G	0.5814	0.8363
9	INTERGENIC	78525441	rs10869801	INTERGENIC	T/C	0.7218	0.5219
9	INTERGENIC	78529535	rs10781372	INTERGENIC	T/C	0.2374	0.4621
9	INTERGENIC	78538013	rs11145032	INTERGENIC	C/A	0.757	0.229
9	INTERGENIC	78541351	rs13283727	INTERGENIC	G/A	0.0276	0.0636
9	INTERGENIC	78550841	rs11145038	INTERGENIC	T/C	0.8904	0.4649
9	INTERGENIC	78557187	rs11145045	INTERGENIC	C/T	0.8104	0.8802
9	INTERGENIC	78558983	rs10217794	INTERGENIC	G/A	0.3162	0.8794
9	INTERGENIC	78560267	rs2225245	INTERGENIC	G/A	0.2954	0.2376
9	INTERGENIC	78561026	rs9314856	INTERGENIC	G/A	0.3766	0.4594
9	INTERGENIC	78562322	rs1425284	INTERGENIC	C/T	0.0561	0.0659
9	INTERGENIC	78571283	rs10521471	INTERGENIC	G/A	0.9773	0.0686
9	INTERGENIC	78576265	rs615037	INTERGENIC	A/G	0.0103	0.027
9	INTERGENIC	78576598	rs613664	INTERGENIC	C/T	0.0091	0.0401
9	INTERGENIC	78576969	rs10119901	INTERGENIC	G/A	0.003	0.0071
9	INTERGENIC	78579840	rs1936283	INTERGENIC	C/T	0.0045	0.0091
9	INTERGENIC	78582069	rs12379174	INTERGENIC	T/C	0.0049	0.162
9	INTERGENIC	78585692	rs7861307	INTERGENIC	A/G	0.0183	0.021
9	INTERGENIC	78585892	rs7864683	INTERGENIC	T/G	0.0027	0.0227
9	INTERGENIC	78587447	rs1417360	INTERGENIC	A/-/C	0.003	0.0323
9	PRUNE2	78590115	rs954974	DOWNSTREAM	G/T	0.003	0.0027
9	PRUNE2	78592404	rs3924629	DOWNSTREAM	T/C	0.6539	0.3123
9	PRUNE2	78594569	rs7854027	INTRONIC	C/T	0.4995	0.2304
9	PRUNE2	78597964	rs10781380	INTRONIC	T/C	7.13x10-7	0.0002
9	PRUNE2	78602730	rs10781381	INTRONIC	T/C	0.3734	0.4578
9	PRUNE2	78604394	rs11145075	INTRONIC	C/A	0.0007	0.0083
9	PRUNE2	78608268	rs17787449	INTRONIC	G/A	0.222	0.3077
9	PRUNE2	78613988	rs1343396	INTRONIC	G/A	0.2249	0.4789
9	PRUNE2	78615512	rs10521470	INTRONIC	G/A	0.0988	0.2368
9	PRUNE2	78616462	rs10781382	INTRONIC	C/T	0.0119	0.0904
9	PRUNE2	78619620	rs10124357	INTRONIC	T/C	0.1084	0.3588
9	PRUNE2	78622600	rs3905245	INTRONIC	T/C	0.1727	0.3942
9	PRUNE2	78626437	rs7867090	INTRONIC	T/C	0.0135	0.184
9	PRUNE2	78628633	rs10869829	INTRONIC	C/T	9.47x10-5	0.0044
9	PRUNE2	78632618	rs4744812	INTRONIC	A/G	0.7134	0.4128
9	PRUNE2	78633834	rs10869830	INTRONIC	C/T	0.0001	0.0048
9	PRUNE2	78635453	rs10869832	INTRONIC	A/G	0.0483	0.2224
9	PRUNE2	78641342	rs11145093	INTRONIC	T/C	0.2502	0.2214
9	PRUNE2	78642927	rs7853555	INTRONIC	T/C	0.0475	0.0286
9	PRUNE2	78644173	rs12003722	INTRONIC	G/A	0.0051	0.0038
9	PRUNE2	78644385	rs12004116	INTRONIC	G/A	0.989	0.297
9	PRUNE2	78645045	rs10781386	INTRONIC	A/G	0.8546	0.6684
9	PRUNE2	78648435	rs10119153	INTRONIC	T/C	0.2281	0.0564
9	PRUNE2	78649298	rs12685440	INTRONIC	G/T	0.4229	0.1153
9	PRUNE2	78650624	rs17785193	INTRONIC	T/C	0.1736	0.2599
9	PRUNE2	78657024	rs1361856	INTRONIC	T/C	0.905	0.2623
9	PRUNE2	78657280	rs1361858	INTRONIC	C/T	0.5814	0.7451
9	PRUNE2	78659154	rs6560555	INTRONIC	T/C	0.3674	0.6213
9	PRUNE2	78661382	rs4745588	INTRONIC	C/T	0.6026	0.6165
9	PRUNE2	78661815	rs12238848	INTRONIC	T/C	0.9103	0.7164
9	PRUNE2	78671957	rs11145109	INTRONIC	A/G	0.9019	0.3783
9	PRUNE2	78689974	rs1125469	INTRONIC	C/T	0.2039	0.2518
9	PRUNE2	78693888	rs11145117	INTRONIC	G/A	0.8562	0.2126
9	PRUNE2	78695467	rs944559	INTRONIC	C/T	0.3865	0.0854
9	PRUNE2	78698071	rs2377811	INTRONIC	T/C	0.3646	0.0893
9	PRUNE2	78701319	rs7031918	INTRONIC	C/T	0.4179	0.1027
9	PRUNE2	78703074	rs12553751	INTRONIC	G/A	0.7805	0.9209
9	PRUNE2	78705115	rs2154044	INTRONIC	T/C	0.8194	0.4764
9	PRUNE2	78706850	rs1343405	INTRONIC	T/C	0.7163	0.0638
9	PRUNE2	78709063	rs7867316	INTRONIC	C/T	0.5413	0.7318
9	PRUNE2	78714117	rs11145132	UPSTREAM	C/T	0.0813	0.0677
9	PRUNE2	78714576	rs3843581	UPSTREAM	C/T	0.0248	0.785
9	PRUNE2	78715418	rs944558	UPSTREAM	C/T	0.179	0.5057
9	INTERGENIC	78716632	rs17787855	INTERGENIC	C/T	0.6562	0.6637
