# Supplementary material for: Hippocampal Atrophy as a Quantitative Trait in a Genome-Wide Association Study Identifying Novel Susceptibility Genes for Alzheimer's Disease
Source: PLoS One. 2009 Aug 7;4(8):e6501. doi: 10.1371/journal.pone.0006501 (PMC2719581; doi:10.1371/journal.pone.0006501)
Supplement: Table S13 — Quantitative trait analysis for the interaction between left and right hippocampi for the SNPs and related genes or chromosomal regions listed in Table 3 of the manuscript. The SNP chromosome, gene, base-pair position, rs number, consequence type and SNP alleles are presented. The p-values for the left and right hippocampi indicate the interaction between SNP and diagnosis in explaining the subjects' degree of hippocampal atrophy. (0.04 MB XLS) [file pone.0006501.s033.xls]

## Sheet: ETS1
Chromosome	Gene	Location	SNP	Consequence_type	Allele	RIGHT-P	LEFT-P
11	INTERGENIC	127682538	rs11221247	INTERGENIC	G/A	0.8756	0.3335
11	INTERGENIC	127684677	rs1522435	INTERGENIC	G/A	0.9721	0.2187
11	INTERGENIC	127687731	rs12577895	INTERGENIC	C/T	0.8576	0.7446
11	INTERGENIC	127688194	rs12574791	INTERGENIC	T/G	0.7314	0.7173
11	INTERGENIC	127692092	rs10893845	INTERGENIC	T/G	0.85	0.4433
11	INTERGENIC	127692593	rs7127307	INTERGENIC	T/C	0.9267	0.731
11	INTERGENIC	127699660	rs7933433	INTERGENIC	G/T	0.6033	0.7708
11	INTERGENIC	127704916	rs4936046	INTERGENIC	C/T	0.1323	0.1468
11	INTERGENIC	127706360	rs4937316	INTERGENIC	C/T	0.0033	0.0937
11	INTERGENIC	127709689	rs7131167	INTERGENIC	C/T	0.0051	0.0319
11	INTERGENIC	127711620	rs6590322	INTERGENIC	C/T	7.72x10-6	0.0044
11	INTERGENIC	127714998	rs12574854	INTERGENIC	A/G	0.0088	0.0273
11	INTERGENIC	127718149	rs871506	INTERGENIC	C/T	0.5108	0.1826
11	INTERGENIC	127723507	rs7937445	INTERGENIC	G/A	0.116	0.5485
11	INTERGENIC	127724500	rs10893854	INTERGENIC	T/C	0.008	0.0268
11	INTERGENIC	127736679	rs1125253	INTERGENIC	T/G	0.0004	0.019
11	INTERGENIC	127739982	rs7120183	INTERGENIC	T/C	0.0012	0.0424
11	INTERGENIC	127740662	rs7104988	INTERGENIC	C/T	0.104	0.3426
11	INTERGENIC	127741268	rs7931302	INTERGENIC	C/A	0.0031	0.0589
11	INTERGENIC	127742146	rs11221265	INTERGENIC	G/A	0.3796	0.9388
11	INTERGENIC	127750541	rs11221267	INTERGENIC	G/A	0.6348	0.8132
11	INTERGENIC	127766621	rs7112864	INTERGENIC	T/C	0.7555	0.9863
11	INTERGENIC	127771448	rs7939722	INTERGENIC	A/C	0.4075	0.2317
11	INTERGENIC	127772438	rs958889	INTERGENIC	G/T	0.2482	0.1995
11	INTERGENIC	127775054	rs7934171	INTERGENIC	C/A	0.3886	0.2298
11	INTERGENIC	127775128	rs11605437	INTERGENIC	T/C	0.6705	0.7427
11	INTERGENIC	127780902	rs9943540	INTERGENIC	A/G	0.7222	0.9509
11	INTERGENIC	127785963	rs11606595	INTERGENIC	G/A	0.9844	0.3179
11	INTERGENIC	127786394	rs1540225	INTERGENIC	C/T	0.2866	0.0692
11	INTERGENIC	127786474	rs6590328	INTERGENIC	G/A	0.6887	0.6934
11	INTERGENIC	127789982	rs6590329	INTERGENIC	T/C	0.8347	0.4966
11	INTERGENIC	127792287	rs11221290	INTERGENIC	C/T	0.7601	0.6944
11	INTERGENIC	127793610	rs7936180	INTERGENIC	C/T	0.6808	0.4372
11	INTERGENIC	127795453	rs10893867	INTERGENIC	A/G	0.5404	0.9461
11	INTERGENIC	127798230	rs10790952	INTERGENIC	T/C	0.8719	0.6119
11	INTERGENIC	127804916	rs7108537	INTERGENIC	A/C	0.8412	0.6756
11	INTERGENIC	127805084	rs7111926	INTERGENIC	C/A	0.382	0.4664
11	INTERGENIC	127807384	rs10750399	INTERGENIC	A/G	0.6242	0.697
11	INTERGENIC	127810781	rs4362159	INTERGENIC	G/T	0.9047	0.512
11	INTERGENIC	127816269	rs6590330	INTERGENIC	G/A	0.9687	0.8751
11	INTERGENIC	127822378	rs7932088	INTERGENIC	G/T	0.4433	0.1585
11	INTERGENIC	127823701	rs12417993	INTERGENIC	T/C	0.3478	0.2963
11	INTERGENIC	127826464	rs4936050	INTERGENIC	A/G	0.7472	0.9243
11	ETS1	127830763	rs10893872	DOWNSTREAM	T/C	0.3982	0.2058
11	ETS1	127831260	rs7939247	DOWNSTREAM	A/G	0.2996	0.1985
11	ETS1	127834123	rs8705	3PRIME_UTR	G/A	0.2126	0.2323
11	ETS1	127835730	rs4937333	3PRIME_UTR	T/C	0.3937	0.248
11	ETS1	127838425	rs12146687	INTRONIC	T/C	0.2172	0.7162
11	ETS1	127840788	rs4937334	INTRONIC	G/A	0.4571	0.4747
11	ETS1	127840867	rs7926975	INTRONIC	G/A	0.4658	0.3884
11	ETS1	127841648	rs10893873	INTRONIC	T/C	0.0411	0.2055
11	ETS1	127843207	rs4520612	INTRONIC	A/G	0.0395	0.5041
11	ETS1	127843613	rs11221320	INTRONIC	C/T	0.5165	0.7924
11	ETS1	127845016	rs7101705	INTRONIC	G/T	0.6797	0.7776
11	ETS1	127848372	rs12294634	INTRONIC	G/A	0.6011	0.6813
11	ETS1	127852003	rs11221322	INTRONIC	T/C	0.9479	0.9998
11	ETS1	127852266	rs4937337	INTRONIC	C/A	0.5123	0.6312
11	ETS1	127854188	rs10790956	INTRONIC	A/G	0.5935	0.8676
11	ETS1	127855863	rs7108562	INTRONIC	T/C	0.83	0.8557
11	ETS1	127855896	rs7122859	INTRONIC	C/T	0.4117	0.4099
11	ETS1	127861938	rs4628683	INTRONIC	A/C	0.7692	0.6245
11	ETS1	127863112	rs4474445	INTRONIC	A/G	0.8325	0.6848
11	ETS1	127866379	rs4937339	INTRONIC	C/A	0.4062	0.6111
11	ETS1	127871073	rs11606009	INTRONIC	T/C	0.6667	0.3116
11	ETS1	127876651	rs7115613	INTRONIC	A/G	0.6404	0.8953
11	ETS1	127877378	rs7941606	INTRONIC	G/A	0.603	0.9711
11	ETS1	127878946	rs10893882	INTRONIC	C/T	0.6363	0.4156
11	ETS1	127879923	rs10893883	INTRONIC	C/T	0.2915	0.1991
11	ETS1	127881305	rs11600456	INTRONIC	T/G	0.2353	0.1841
11	ETS1	127886184	rs11221332	INTRONIC	C/T	0.6219	0.701
11	ETS1	127888014	rs4372467	INTRONIC	G/A	0.2562	0.0499
11	ETS1	127888287	rs7129690	INTRONIC	T/C	0.9945	0.448
11	ETS1	127891116	rs11221335	INTRONIC	T/C	0.501	0.5485
11	ETS1	127892632	rs7946009	INTRONIC	T/C	0.2525	0.2934
11	ETS1	127893983	rs7116578	INTRONIC	G/A	0.1296	0.2436
11	ETS1	127894601	rs11819995	INTRONIC	C/T	0.483	0.7364
11	ETS1	127900838	rs12223943	INTRONIC	G/T	0.4249	0.9272
11	ETS1	127903519	rs4937342	INTRONIC	T/G	0.0739	0.0425
