# Supplementary material for: Hippocampal Atrophy as a Quantitative Trait in a Genome-Wide Association Study Identifying Novel Susceptibility Genes for Alzheimer's Disease
Source: PLoS One. 2009 Aug 7;4(8):e6501. doi: 10.1371/journal.pone.0006501 (PMC2719581; doi:10.1371/journal.pone.0006501)
Supplement: Table S14 — Quantitative trait analysis for the interaction between left and right hippocampi for the SNPs and related genes or chromosomal regions listed in Table 3 of the manuscript. The SNP chromosome, gene, base-pair position, rs number, consequence type and SNP alleles are presented. The p-values for the left and right hippocampi indicate the interaction between SNP and diagnosis in explaining the subjects' degree of hippocampal atrophy. (0.04 MB XLS) [file pone.0006501.s034.xls]

## Sheet: ARID2-SFRS2IP
Chromosome	Gene	Location	SNP	Consequence_type	Allele	RIGHT-P	LEFT-P
12	INTERGENIC	44228611	rs11183106	INTERGENIC	G/A	0.5975	0.3767
12	INTERGENIC	44230783	rs2408268	INTERGENIC	C/T	0.7631	0.3757
12	INTERGENIC	44239929	rs7964768	INTERGENIC	A/G	0.038	0.1889
12	INTERGENIC	44244600	rs11832143	INTERGENIC	A/G	0.9149	0.5686
12	INTERGENIC	44245438	rs7314254	INTERGENIC	T/G	0.9867	0.9697
12	INTERGENIC	44248214	rs4376964	INTERGENIC	T/C	0.6332	0.5064
12	INTERGENIC	44262182	rs2544099	INTERGENIC	T/C	0.5104	0.7709
12	INTERGENIC	44263854	rs2544098	INTERGENIC	A/G	0.9431	0.5994
12	INTERGENIC	44266906	rs2544094	INTERGENIC	A/C	0.1315	0.6905
12	INTERGENIC	44273005	rs10880823	INTERGENIC	T/C	0.9855	0.5744
12	INTERGENIC	44277208	rs1862020	INTERGENIC	T/G	0.9809	0.1572
12	INTERGENIC	44277267	rs1862019	INTERGENIC	C/T	0.436	0.6721
12	INTERGENIC	44278421	rs2544087	INTERGENIC	G/A	0.5326	0.3473
12	INTERGENIC	44288969	rs10082730	INTERGENIC	T/C	0.5683	0.9689
12	INTERGENIC	44300083	rs2712599	INTERGENIC	A/G	0.7952	0.9305
12	INTERGENIC	44307552	rs2544073	INTERGENIC	C/T	0.4661	0.2189
12	INTERGENIC	44326150	rs4768654	INTERGENIC	C/T	0.0454	0.3122
12	INTERGENIC	44327645	rs6582566	INTERGENIC	A/G	0.9941	0.7095
12	INTERGENIC	44329448	rs11183154	INTERGENIC	C/T	0.009	0.1539
12	INTERGENIC	44329691	rs11183155	INTERGENIC	C/T	0.0194	0.235
12	INTERGENIC	44329880	rs10492248	INTERGENIC	T/C	0.0419	0.3379
12	INTERGENIC	44363962	rs12321981	INTERGENIC	A/C	0.0293	0.1053
12	INTERGENIC	44370966	rs7963439	INTERGENIC	G/A	0.1479	0.2007
12	INTERGENIC	44372975	rs7979398	INTERGENIC	C/T	0.0556	0.3223
12	INTERGENIC	44374060	rs6582568	INTERGENIC	C/T	0.2645	0.1211
12	INTERGENIC	44378810	rs726603	INTERGENIC	A/C	0.5301	0.2089
12	INTERGENIC	44386320	rs1133879	INTERGENIC	T/C	0.2328	0.1397
12	INTERGENIC	44397885	rs3815661	INTERGENIC	C/A	0.4232	0.3401
12	ARID2	44420742	rs7138997	INTRONIC	T/C	0.0198	0.1009
12	ARID2	44421079	rs2193749	INTRONIC	T/C	0.0139	0.1223
12	ARID2	44427639	rs11183193	INTRONIC	C/T	0.0008	0.0027
12	ARID2	44461736	rs2059405	INTRONIC	A/G	0.0001	0.0028
12	ARID2	44500134	rs11183212	INTRONIC	A/G	0.6241	0.2631
12	ARID2	44523379	rs11183220	INTRONIC	A/C	0.6705	0.9477
12	ARID2	44591266	rs17662709	DOWNSTREAM	T/C	0.0366	0.0163
12	INTERGENIC	44593315	rs1291625	INTERGENIC	C/T	0.0001	0.0007
12	SFRS2IP	44612415	rs10880869	INTRONIC	T/C	0.7994	0.7203
12	SFRS2IP	44631246	rs10880872	INTRONIC	T/C	0.5349	0.2052
12	SFRS2IP	44639546	rs1012642	INTRONIC	C/T	0.0251	0.1228
12	SFRS2IP	44642918	rs11183251	INTRONIC	T/C	0.5194	0.4593
12	SFRS2IP	44646091	rs10880873	INTRONIC	C/T	0.426	0.3986
12	SFRS2IP	44647939	rs17096380	INTRONIC	C/A	0.0034	0.0053
12	SFRS2IP	44661573	rs10880880	INTRONIC	A/G	0.0237	0.1206
12	INTERGENIC	44679428	rs2114844	INTERGENIC	T/C	0.0007	0.0054
12	INTERGENIC	44711465	rs11183294	INTERGENIC	A/T	0.0035	0.0022
12	INTERGENIC	44722474	rs11183300	INTERGENIC	C/T	0.0029	0.0118
12	INTERGENIC	44724014	rs10880895	INTERGENIC	T/C	0.0031	0.0125
12	INTERGENIC	44726262	rs7967938	INTERGENIC	G/A	0.2332	0.8169
12	INTERGENIC	44731862	rs7294699	INTERGENIC	G/A	0.0037	0.0168
12	INTERGENIC	44743093	rs11534909	INTERGENIC	C/T	0.1332	0.5252
12	INTERGENIC	44750684	rs1444588	INTERGENIC	C/T	0.0018	0.0043
12	INTERGENIC	44751247	rs7313125	INTERGENIC	G/A	0.1847	0.5547
12	INTERGENIC	44756056	rs11835373	INTERGENIC	A/G	0.0453	0.0325
12	INTERGENIC	44760335	rs1596623	INTERGENIC	A/G	0.0474	0.1807
12	INTERGENIC	44762468	rs1444584	INTERGENIC	T/C	0.0007	0.0032
12	INTERGENIC	44765323	rs10880908	INTERGENIC	T/C	0.0016	0.0034
12	INTERGENIC	44769621	rs7304591	INTERGENIC	T/G	0.0113	0.0185
12	INTERGENIC	44772105	rs1373549	INTERGENIC	A/G	6.45x10-6	2.34x10-5
12	INTERGENIC	44788133	rs10880917	INTERGENIC	T/G	0.0024	0.0217
12	INTERGENIC	44802396	rs10880923	INTERGENIC	C/A	0.0311	0.0398
12	INTERGENIC	44802761	rs10506265	INTERGENIC	T/C	0.0688	0.0467
12	INTERGENIC	44804248	rs10129041	INTERGENIC	C/T	0.209	0.2832
12	INTERGENIC	44810146	rs1867501	INTERGENIC	C/T	0.0342	0.0704
12	INTERGENIC	44813137	rs1822743	INTERGENIC	T/C	0.3016	0.4087
12	INTERGENIC	44825311	rs9325217	INTERGENIC	T/C	0.8773	0.9582
12	INTERGENIC	44829051	rs17607940	INTERGENIC	G/T	0.3021	0.7283
12	INTERGENIC	44829221	rs1345091	INTERGENIC	G/A	0.0284	0.0882
12	INTERGENIC	44830126	rs935238	INTERGENIC	A/C	0.3525	0.9109
12	INTERGENIC	44834540	rs12423604	INTERGENIC	T/C	0.0269	0.0467
12	INTERGENIC	44840997	rs1867500	INTERGENIC	C/T	0.4026	0.4169
12	INTERGENIC	44845032	rs4768689	INTERGENIC	C/A	0.6162	0.948
12	INTERGENIC	44852183	rs1348573	INTERGENIC	T/C	0.1392	0.1096
12	INTERGENIC	44852421	rs2408472	INTERGENIC	T/C	0.007	0.0258
12	INTERGENIC	44855714	rs7958854	INTERGENIC	A/G	0.0143	0.0375
12	SLC38A1	44861275	rs7301594	DOWNSTREAM	G/A	0.2136	0.4869
12	SLC38A1	44863338	rs1049358	3PRIME_UTR	G/A	0.3374	0.5731
12	SLC38A1	44864008	rs15750	3PRIME_UTR	A/G	0.4363	0.4614
12	SLC38A1	44864277	rs3742057	3PRIME_UTR	A/G	0.5421	0.6229
12	SLC38A1	44864339	rs3742058	3PRIME_UTR	G/T	0.3401	0.8972
12	SLC38A1	44864969	rs2053648	3PRIME_UTR	T/C	0.3636	0.7317
12	SLC38A1	44865655	rs3497	3PRIME_UTR	A/G	0.5728	0.269
12	SLC38A1	44865717	rs3498	3PRIME_UTR	A/G	0.2544	0.5755
12	SLC38A1	44865857	rs11183385	3PRIME_UTR	A/G	0.7017	0.2971
12	SLC38A1	44867576	rs3742060	3PRIME_UTR	T/G	0.015	0.1231
12	SLC38A1	44871759	rs7311868	INTRONIC	T/C	0.6768	0.8594
12	SLC38A1	44877604	rs6582621	INTRONIC	G/A	0.5694	0.6427
12	SLC38A1	44881951	rs7977873	INTRONIC	C/T	0.314	0.8993
12	SLC38A1	44883353	rs12827581	INTRONIC	C/T	0.7548	0.7292
12	SLC38A1	44886823	rs1492891	INTRONIC	C/T	0.7311	0.7088
12	SLC38A1	44887021	rs1492889	INTRONIC	G/A	0.7896	0.8251
12	SLC38A1	44887323	rs2289768	INTRONIC	C/T	0.7602	0.5391
12	SLC38A1	44889667	rs11615731	INTRONIC	T/G	0.7417	0.667
12	SLC38A1	44890335	rs11183395	INTRONIC	A/G	0.0941	0.5778
12	SLC38A1	44890358	rs17096794	INTRONIC	A/G	0.8139	0.6392
12	SLC38A1	44890824	rs12828089	INTRONIC	C/A	0.3699	0.9708
12	SLC38A1	44891506	rs6582622	INTRONIC	T/C	0.934	0.8984
12	SLC38A1	44892226	rs963326	INTRONIC	G/A	0.6379	0.8637
12	SLC38A1	44893547	rs962683	INTRONIC	C/T	0.7618	0.8508
12	SLC38A1	44894294	rs11183397	INTRONIC	G/T	0.5339	0.6366
12	SLC38A1	44900908	rs10880939	INTRONIC	C/T	0.6024	0.9126
12	SLC38A1	44905130	rs12833767	INTRONIC	C/T	0.3558	0.6818
12	SLC38A1	44905397	rs10880942	INTRONIC	T/C	0.5396	0.8454
12	SLC38A1	44906568	rs7971883	INTRONIC	A/C	0.8929	0.7484
12	SLC38A1	44910074	rs2125645	INTRONIC	G/A	0.3128	0.6192
12	SLC38A1	44910379	rs11183403	INTRONIC	A/C	0.5989	0.8356
12	SLC38A1	44915478	rs1492893	INTRONIC	C/T	0.2795	0.9764
12	SLC38A1	44941554	rs3847985	INTRONIC	G/A	0.3557	0.884
12	SLC38A1	44944962	rs973988	INTRONIC	T/A	0.1962	0.5015
12	SLC38A1	44946775	rs1492888	INTRONIC	C/T	0.9995	0.3494
12	SLC38A1	44947546	rs2279560	INTRONIC	A/G	0.7446	0.5066
12	INTERGENIC	44977754	rs1492892	INTERGENIC	C/A	0.8688	0.8636
