# Supplementary material for: Hippocampal Atrophy as a Quantitative Trait in a Genome-Wide Association Study Identifying Novel Susceptibility Genes for Alzheimer's Disease
Source: PLoS One. 2009 Aug 7;4(8):e6501. doi: 10.1371/journal.pone.0006501 (PMC2719581; doi:10.1371/journal.pone.0006501)
Supplement: Table S15 — Quantitative trait analysis for the interaction between left and right hippocampi for the SNPs and related genes or chromosomal regions listed in Table 3 of the manuscript. The SNP chromosome, gene, base-pair position, rs number, consequence type and SNP alleles are presented. The p-values for the left and right hippocampi indicate the interaction between SNP and diagnosis in explaining the subjects' degree of hippocampal atrophy. (0.04 MB XLS) [file pone.0006501.s035.xls]

## Sheet: CAND1
Chromosome	Gene	Location	SNP	Consequence_type	Allele	RIGHT-P	LEFT-P
12	INTERGENIC	65801361	rs1526839	INTERGENIC	A/G	0.2738	0.0222
12	INTERGENIC	65802342	rs17781166	INTERGENIC	G/A	0.6545	0.1519
12	INTERGENIC	65804568	rs10878566	INTERGENIC	A/G	0.2748	0.0654
12	INTERGENIC	65812323	rs11835794	INTERGENIC	T/C	0.3596	0.0882
12	INTERGENIC	65813285	rs10748069	INTERGENIC	C/A	0.1224	0.0125
12	INTERGENIC	65816931	rs4603385	INTERGENIC	C/T	0.3575	0.0441
12	INTERGENIC	65822926	rs1526832	INTERGENIC	C/T	0.1898	0.0677
12	INTERGENIC	65841593	rs893280	INTERGENIC	C/T	0.1955	0.1214
12	INTERGENIC	65842386	rs1405467	INTERGENIC	A/G	0.1955	0.1214
12	INTERGENIC	65843047	rs12317689	INTERGENIC	G/A	0.2665	0.6258
12	INTERGENIC	65846964	rs17781334	INTERGENIC	C/T	0.0865	0.4814
12	INTERGENIC	65850822	rs11176611	INTERGENIC	A/G	0.1132	0.2547
12	INTERGENIC	65865784	rs4244071	INTERGENIC	T/C	0.9173	0.3167
12	INTERGENIC	65867568	rs1437493	INTERGENIC	C/T	0.027	0.0409
12	INTERGENIC	65868526	rs10161075	INTERGENIC	A/G	0.2446	0.3851
12	INTERGENIC	65872311	rs1866256	INTERGENIC	A/C	0.562	0.1562
12	INTERGENIC	65884250	rs10735940	INTERGENIC	C/T	0.5485	0.3271
12	INTERGENIC	65915098	rs1082714	INTERGENIC	C/T	4.60x10-6	3.14x10-5
12	INTERGENIC	65917710	rs1252435	INTERGENIC	G/A	0.0011	0.0023
12	INTERGENIC	65920910	rs12320481	INTERGENIC	T/C	0.0008	0.002
12	INTERGENIC	65943748	rs710628	INTERGENIC	A/C	0.1372	0.1516
12	CAND1	65946872	rs17781591	UPSTREAM	G/A	0.2584	0.3168
12	CAND1	65958026	rs11176668	INTRONIC	C/T	0.5984	0.5466
12	CAND1	65959137	rs17781645	INTRONIC	A/G	0.3985	0.5345
12	CAND1	65964384	rs7954050	INTRONIC	A/G	0.1105	0.1614
12	CAND1	65978417	rs4913538	INTRONIC	G/T	0.019	0.0414
12	CAND1	65983089	rs800166	INTRONIC	G/A	0.1681	0.2333
12	CAND1	65983584	rs710630	INTRONIC	C/T	0.1119	0.1441
12	CAND1	65989453	rs1152877	INTRONIC	C/T	0.0156	0.0325
12	CAND1	65991454	rs11176678	INTRONIC	A/G	0.1955	0.2841
12	CAND1	65992733	rs1060350	SYNONYMOUS_CODING	G/A	0.0191	0.0417
12	CAND1	65999035	rs10878598	DOWNSTREAM	A/G	0.6306	0.3568
12	CAND1	65999245	rs17103688	DOWNSTREAM	A/G	0.1107	0.1628
12	INTERGENIC	66001772	rs1066387	INTERGENIC	A/G	0.1681	0.2333
12	INTERGENIC	66005635	rs1066396	INTERGENIC	C/T	0.0155	0.0322
12	INTERGENIC	66007018	rs1066398	INTERGENIC	G/A	0.0155	0.0322
12	INTERGENIC	66022854	rs775641	INTERGENIC	G/A	0.2642	0.4367
12	INTERGENIC	66026521	rs983630	INTERGENIC	A/G	0.1681	0.2333
12	INTERGENIC	66035749	rs775648	INTERGENIC	G/T	0.3302	0.2144
12	INTERGENIC	66038430	rs733642	INTERGENIC	C/T	0.1169	0.1934
12	AC078983.17	66051103	rs10506545	DOWNSTREAM	C/T	0.1955	0.2841
12	AC078983.17	66051844	rs2178466	DOWNSTREAM	T/C	0.0225	0.0659
12	AC078983.17	66054841	rs11176704	UPSTREAM	C/A	0.1809	0.3144
12	INTERGENIC	66060010	rs1561335	INTERGENIC	C/T	0.7175	0.3795
12	INTERGENIC	66061012	rs12230206	INTERGENIC	G/A	0.414	0.9401
12	INTERGENIC	66066572	rs10506546	INTERGENIC	T/G	0.2765	0.8398
12	INTERGENIC	66070885	rs10878607	INTERGENIC	T/C	0.0584	0.0526
12	INTERGENIC	66072694	rs7135979	INTERGENIC	A/C	0.1368	0.1274
12	INTERGENIC	66073037	rs11176716	INTERGENIC	G/A	0.2706	0.4204
12	INTERGENIC	66076924	rs7316350	INTERGENIC	G/A	0.1949	0.1133
12	INTERGENIC	66079378	rs7297753	INTERGENIC	A/G	0.1344	0.0755
12	INTERGENIC	66082437	rs4913322	INTERGENIC	G/A	0.147	0.0812
12	INTERGENIC	66089772	rs7133608	INTERGENIC	G/A	0.1512	0.0905
12	INTERGENIC	66099524	rs11176732	INTERGENIC	T/C	0.3649	0.4115
12	INTERGENIC	66105288	rs1997462	INTERGENIC	G/A	0.2496	0.3614
12	INTERGENIC	66108999	rs1161178	INTERGENIC	A/G	0.091	0.2628
12	INTERGENIC	66111844	rs1882035	INTERGENIC	A/G	0.5213	0.1218
12	INTERGENIC	66112065	rs1178001	INTERGENIC	G/A	0.135	0.2321
12	INTERGENIC	66113626	rs10878613	INTERGENIC	G/A	0.0312	0.0056
12	INTERGENIC	66113661	rs10878614	INTERGENIC	G/A	0.0306	0.0044
