# Supplementary material for: Hippocampal Atrophy as a Quantitative Trait in a Genome-Wide Association Study Identifying Novel Susceptibility Genes for Alzheimer's Disease
Source: PLoS One. 2009 Aug 7;4(8):e6501. doi: 10.1371/journal.pone.0006501 (PMC2719581; doi:10.1371/journal.pone.0006501)
Supplement: Table S16 — Quantitative trait analysis for the interaction between left and right hippocampi for the SNPs and related genes or chromosomal regions listed in Table 3 of the manuscript. The SNP chromosome, gene, base-pair position, rs number, consequence type and SNP alleles are presented. The p-values for the left and right hippocampi indicate the interaction between SNP and diagnosis in explaining the subjects' degree of hippocampal atrophy. (0.04 MB XLS) [file pone.0006501.s036.xls]

## Sheet: RP11-506F17.1
Chromosome	Gene	Location	SNP	Consequence_type	Allele	RIGHT-P	LEFT-P
13	INTERGENIC	85709160	rs11070086	INTERGENIC	G/A	0.4776	0.8553
13	BX088568.4	85723976	rs9518596	UPSTREAM	T/G	0.4947	0.9528
13	BX088568.4	85726040	rs17612116	WITHIN_NON_CODING_GENE	A/G	0.726	0.2394
13	BX088568.4	85727267	rs9514373	WITHIN_NON_CODING_GENE	T/C	0.4667	0.8576
13	BX088568.4	85728781	rs7489763	DOWNSTREAM	T/C	0.4853	0.8143
13	BX088568.4	85730242	rs7490720	DOWNSTREAM	T/G	0.238	0.9813
13	INTERGENIC	85734784	rs1939647	INTERGENIC	A/C	0.3342	0.305
13	INTERGENIC	85735283	rs12584999	INTERGENIC	G/A	0.4212	0.9258
13	INTERGENIC	85739322	rs7400715	INTERGENIC	A/G	0.7217	0.9617
13	INTERGENIC	85747575	rs1939662	INTERGENIC	T/C	0.4315	0.3915
13	INTERGENIC	85749280	rs9588917	INTERGENIC	G/T	0.0733	0.259
13	INTERGENIC	85754813	rs7337110	INTERGENIC	C/T	0.3672	0.5311
13	INTERGENIC	85757696	rs7333303	INTERGENIC	C/A	0.0486	0.1534
13	INTERGENIC	85758563	rs4576936	INTERGENIC	C/T	0.4617	0.4052
13	INTERGENIC	85761708	rs4772827	INTERGENIC	T/G	0.203	0.2816
13	INTERGENIC	85771778	rs4262819	INTERGENIC	C/T	0.2473	0.4307
13	INTERGENIC	85774450	rs9589644	INTERGENIC	T/C	0.7321	0.8958
13	INTERGENIC	85780354	rs9805613	INTERGENIC	A/G	0.4314	0.7329
13	INTERGENIC	85783272	rs12428006	INTERGENIC	G/T	0.0198	0.0151
13	INTERGENIC	85788685	rs4365170	INTERGENIC	T/C	0.6171	0.4954
13	INTERGENIC	85792809	rs9516464	INTERGENIC	T/G	0.6471	0.5327
13	INTERGENIC	85796146	rs9590167	INTERGENIC	A/G	0.0493	0.098
13	INTERGENIC	85808355	rs7336307	INTERGENIC	C/A	0.39	0.6589
13	INTERGENIC	85823574	rs1114392	INTERGENIC	T/C	0.5784	0.6066
13	INTERGENIC	85824756	rs9517120	INTERGENIC	A/G	0.6793	0.58
13	INTERGENIC	85838283	rs17650176	INTERGENIC	T/C	0.0673	0.0446
13	INTERGENIC	85840908	rs12871969	INTERGENIC	G/A	0.1274	0.2031
13	INTERGENIC	85842380	rs9585170	INTERGENIC	G/A	0.8591	0.9463
13	INTERGENIC	85858284	rs12877888	INTERGENIC	G/A	0.7439	0.7096
13	INTERGENIC	85863400	rs9585777	INTERGENIC	A/G	0.5906	0.6625
13	INTERGENIC	85864710	rs9518594	INTERGENIC	T/C	0.0366	0.1128
13	INTERGENIC	85866837	rs1502060	INTERGENIC	C/T	0.298	0.9053
13	INTERGENIC	85867097	rs1502061	INTERGENIC	C/T	0.3177	0.8176
13	INTERGENIC	85871195	rs1566655	INTERGENIC	G/A	0.3271	0.8285
13	INTERGENIC	85871398	rs4772188	INTERGENIC	T/C	0.0074	0.3353
13	INTERGENIC	85876054	rs10507962	INTERGENIC	C/T	0.054	0.0801
13	INTERGENIC	85891876	rs9558361	INTERGENIC	T/C	0.0075	0.3332
13	INTERGENIC	85908326	rs1502069	INTERGENIC	C/T	0.0366	0.4076
13	INTERGENIC	85912495	rs1502067	INTERGENIC	C/T	0.3957	0.9348
13	INTERGENIC	85914480	rs1393272	INTERGENIC	A/G	0.2908	0.5058
13	INTERGENIC	85934331	rs1502055	INTERGENIC	C/T	0.4613	0.5318
13	INTERGENIC	85937052	rs9555560	INTERGENIC	T/C	0.0906	0.7381
13	INTERGENIC	85938128	rs1502056	INTERGENIC	C/T	0.2501	0.766
13	INTERGENIC	85938652	rs2340469	INTERGENIC	C/T	0.2951	0.7633
13	INTERGENIC	85953114	rs4772882	INTERGENIC	T/C	0.0466	0.2441
13	INTERGENIC	85957066	rs9559994	INTERGENIC	T/C	0.0247	0.1927
13	INTERGENIC	85957110	rs9559996	INTERGENIC	A/C	0.0894	0.6046
13	INTERGENIC	85969056	rs4608205	INTERGENIC	G/A	0.0003	0.0045
13	INTERGENIC	85974519	rs9555837	INTERGENIC	C/A	1.38x10-5	0.0005
13	INTERGENIC	85980670	rs1328848	INTERGENIC	C/T	0.0119	0.0705
13	INTERGENIC	85983380	rs1410763	INTERGENIC	A/C	0.0167	0.1153
13	INTERGENIC	85984283	rs9301535	INTERGENIC	G/A	8.63x10-6	0.0011
13	INTERGENIC	85990096	rs1360052	INTERGENIC	A/G	0.3524	0.3648
13	INTERGENIC	85990748	rs9301538	INTERGENIC	C/T	0.0198	0.1198
13	INTERGENIC	85993095	rs1410761	INTERGENIC	C/A	4.14x10-5	0.0046
13	INTERGENIC	86002839	rs7987256	INTERGENIC	A/C	6.75x10-5	0.0063
13	INTERGENIC	86006618	rs2880005	INTERGENIC	A/G	0.0377	0.2993
13	INTERGENIC	86017648	rs8000086	INTERGENIC	T/C	0.0103	0.1925
13	INTERGENIC	86033803	rs1592331	INTERGENIC	T/C	0.5973	0.2907
13	INTERGENIC	86036846	rs9560385	INTERGENIC	T/C	2.19x10-5	0.0036
13	INTERGENIC	86040858	rs4773460	INTERGENIC	C/T	2.11x10-6	0.001
13	INTERGENIC	86061074	rs7324406	INTERGENIC	A/C	0.4226	0.1994
13	INTERGENIC	86068139	rs9301625	INTERGENIC	A/C	1.44x10-5	0.0026
13	INTERGENIC	86081153	rs3904912	INTERGENIC	T/C	0.3439	0.7719
13	INTERGENIC	86085619	rs1343563	INTERGENIC	A/C	0.0001	0.0127
13	INTERGENIC	86109968	rs2987542	INTERGENIC	G/A	0.0005	0.0627
13	INTERGENIC	86117597	rs9522938	INTERGENIC	C/A	0.761	0.7408
13	INTERGENIC	86136841	rs9560656	INTERGENIC	C/T	3.49x10-5	0.0075
13	INTERGENIC	86151401	rs1578867	INTERGENIC	T/C	0.0588	0.2965
13	INTERGENIC	86158449	rs9515798	INTERGENIC	A/G	0.6981	0.7046
13	INTERGENIC	86162636	rs1343566	INTERGENIC	G/T	0.0335	0.0675
13	RP11-506F17.1	86172379	rs1592332	UPSTREAM	T/C	0.2897	0.7116
13	INTERGENIC	86205378	rs9515892	INTERGENIC	C/T	5.52x10-5	0.007
13	INTERGENIC	86232337	rs6492549	INTERGENIC	C/T	0.0818	0.2767
13	INTERGENIC	86237616	rs12585439	INTERGENIC	A/G	0.0017	0.0662
13	INTERGENIC	86241000	rs4628822	INTERGENIC	T/C	0.4335	0.6674
13	INTERGENIC	86241525	rs7988039	INTERGENIC	C/T	0.0188	0.0793
13	INTERGENIC	86261101	rs9523416	INTERGENIC	A/G	0.1065	0.2523
13	INTERGENIC	86269179	rs3015512	INTERGENIC	A/C	0.0136	0.0511
