# Supplementary material for: Hippocampal Atrophy as a Quantitative Trait in a Genome-Wide Association Study Identifying Novel Susceptibility Genes for Alzheimer's Disease
Source: PLoS One. 2009 Aug 7;4(8):e6501. doi: 10.1371/journal.pone.0006501 (PMC2719581; doi:10.1371/journal.pone.0006501)
Supplement: Table S18 — Quantitative trait analysis for the interaction between left and right hippocampi for the SNPs and related genes or chromosomal regions listed in Table 3 of the manuscript. The SNP chromosome, gene, base-pair position, rs number, consequence type and SNP alleles are presented. The p-values for the left and right hippocampi indicate the interaction between SNP and diagnosis in explaining the subjects' degree of hippocampal atrophy. (0.04 MB XLS) [file pone.0006501.s038.xls]

## Sheet: C20orf132
Chromosome	Gene	Location	SNP	Consequence_type	Allele	RIGHT-P	LEFT-P
20	C20orf118	34941149	rs3748462	INTRONIC	G/A	0.261	0.0242
20	C20orf118	34952889	rs6029941	INTRONIC	G/A	0.3971	0.0469
20	C20orf118	34953360	rs7265241	INTRONIC	A/G	0.0386	0.0886
20	SAMHD1	34958776	rs1291142	INTRONIC	A/G	0.1221	0.1315
20	SAMHD1	34970620	rs12481143	INTRONIC	G/A	0.0738	0.0022
20	SAMHD1	34984285	rs7268811	INTRONIC	C/A	0.0276	0.0021
20	SAMHD1	34987036	rs6030188	INTRONIC	C/T	0.6218	0.0756
20	SAMHD1	34989606	rs6016783	INTRONIC	T/G	0.0053	0.0042
20	SAMHD1	34994883	rs6130139	INTRONIC	T/C	0.8774	0.3083
20	SAMHD1	35003238	rs6030315	INTRONIC	C/A	0.0113	0.0085
20	SAMHD1	35017002	rs8115958	UPSTREAM	A/G	0.1462	0.1174
20	INTERGENIC	35018836	rs6030424	INTERGENIC	G/A	0.4933	0.2286
20	INTERGENIC	35023663	rs4812641	INTERGENIC	C/A	0.0502	0.09
20	RBL1	35070812	rs6030712	INTRONIC	G/A	0.3908	0.2303
20	RBL1	35106470	rs3897903	INTRONIC	C/T	0.0099	0.004
20	RBL1	35112471	rs6031009	INTRONIC	G/A	0.4464	0.2783
20	RBL1	35143867	rs1892205	INTRONIC	T/C	0.001	0.0012
20	RBL1	35151129	rs6073285	INTRONIC	T/C	0.3153	0.5792
20	C20orf132	35172552	rs1780706	INTRONIC	C/T	0.3329	0.2258
20	C20orf132	35174208	rs1744760	NON_SYNONYMOUS_CODING	T/C	0.0017	0.0012
20	C20orf132	35196094	rs1618407	INTRONIC	T/C	0.2483	0.1378
20	C20orf132	35199751	rs8115854	NON_SYNONYMOUS_CODING	A/G	5.84x10-6	2.22x10-6
20	C20orf132	35203006	rs1744769	SYNONYMOUS_CODING	T/C	0.309	0.1848
20	C20orf132	35206758	rs1780682	INTRONIC	C/T	0.0014	0.0017
20	RP3-343K2.4	35236602	rs8120307	INTRONIC	T/C	6.93x10-5	2.17x10-5
20	RPN2	35243197	rs6031882	INTRONIC	T/C	3.96x10-5	6.54x10-6
20	RPN2	35255697	rs2300153	INTRONIC	A/C	0.1948	0.1008
20	RPN2	35263358	rs11908607	INTRONIC	T/C	0.5694	0.365
20	RPN2	35276337	rs11700106	INTRONIC	A/G	0.5621	0.6814
20	RPN2	35301633	rs6017596	INTRONIC	C/T	0.0884	0.1012
20	RPN2	35304638	rs8114696	DOWNSTREAM	A/G	0.0221	0.0474
20	RPN2	35306609	rs1534974	DOWNSTREAM	A/G	0.7729	0.6238
20	RPN2	35310424	rs1073768	DOWNSTREAM	T/C	0.0918	0.0813
20	GHRH	35320941	rs6032470	INTRONIC	T/C	0.6821	0.3788
20	INTERGENIC	35342708	rs6073964	INTERGENIC	G/A	0.9188	0.7173
20	MANBAL	35358710	rs6074018	INTRONIC	G/A	0.9963	0.6494
20	MANBAL	35378588	rs1806940	3PRIME_UTR	G/T	0.529	0.9762
20	INTERGENIC	35388351	rs10470023	INTERGENIC	T/C	0.9521	0.7817
20	INTERGENIC	35391249	rs6011959	INTERGENIC	G/A	0.4494	0.2775
20	INTERGENIC	35401507	rs6017901	INTERGENIC	T/C	0.0656	0.0449
20	INTERGENIC	35402488	rs6094373	INTERGENIC	T/C	0.6311	0.9357
20	SRC	35416303	rs747182	INTRONIC	T/C	0.5547	0.4392
20	SRC	35420067	rs6017996	INTRONIC	G/A	0.812	0.5974
20	SRC	35424206	rs6018027	INTRONIC	T/C	0.334	0.1808
20	SRC	35426741	rs6063022	INTRONIC	C/T	0.2568	0.0993
20	SRC	35438689	rs6094509	INTRONIC	A/G	0.8447	0.4561
20	SRC	35440545	rs12329503	INTRONIC	T/C	0.9345	0.73
20	SRC	35442559	rs6090585	INTRONIC	G/A	0.3586	0.2756
20	SRC	35443071	rs6018199	INTRONIC	T/G	0.7524	0.4891
20	SRC	35455953	rs6018257	INTRONIC	T/C	0.1656	0.0799
20	INTERGENIC	35475054	rs11905013	INTERGENIC	T/C	0.3962	0.264
20	INTERGENIC	35485009	rs6018428	INTERGENIC	G/A	0.0124	0.0242
20	INTERGENIC	35485260	rs6018432	INTERGENIC	C/T	0.0262	0.022
20	INTERGENIC	35496979	rs11086214	INTERGENIC	T/C	0.5498	0.9752
20	INTERGENIC	35501287	rs6012200	INTERGENIC	G/A	0.9693	0.8405
