# Supplementary material for: Hippocampal Atrophy as a Quantitative Trait in a Genome-Wide Association Study Identifying Novel Susceptibility Genes for Alzheimer's Disease
Source: PLoS One. 2009 Aug 7;4(8):e6501. doi: 10.1371/journal.pone.0006501 (PMC2719581; doi:10.1371/journal.pone.0006501)
Supplement: Table S19 — Quantitative trait analysis for the interaction between left and right hippocampi for the SNPs and related genes or chromosomal regions listed in Table 3 of the manuscript. The SNP chromosome, gene, base-pair position, rs number, consequence type and SNP alleles are presented. The p-values for the left and right hippocampi indicate the interaction between SNP and diagnosis in explaining the subjects' degree of hippocampal atrophy. (0.04 MB XLS) [file pone.0006501.s039.xls]

## Sheet: ZBP1
Chromosome	Gene	Location	SNP	Consequence_type	Allele	RIGHT-P	LEFT-P
20	INTERGENIC	55543699	rs6025610	INTERGENIC	C/T	0.2607	0.5264
20	INTERGENIC	55546963	rs6070131	INTERGENIC	C/T	0.67	0.8108
20	INTERGENIC	55549131	rs6099671	INTERGENIC	T/C	0.1197	0.6305
20	INTERGENIC	55552072	rs8119374	INTERGENIC	T/C	0.2617	0.8633
20	INTERGENIC	55554835	rs4811873	INTERGENIC	T/C	0.5113	0.9703
20	INTERGENIC	55559297	rs1474758	INTERGENIC	C/A	0.8428	0.4268
20	INTERGENIC	55559435	rs6092495	INTERGENIC	C/T	0.245	0.1228
20	INTERGENIC	55561336	rs17411904	INTERGENIC	T/C	0.2375	0.67
20	INTERGENIC	55564026	rs1543375	INTERGENIC	A/G	0.6668	0.3637
20	PCK1	55568605	rs1328757	UPSTREAM	C/T	0.2476	0.8818
20	PCK1	55570590	rs6070157	SYNONYMOUS_CODING	C/T	0.4382	0.6681
20	PCK1	55571093	rs1040566	INTRONIC	A/C	0.2196	0.0724
20	PCK1	55572027	rs8192708	NON_SYNONYMOUS_CODING;SPLICE_SITE	A/G	0.5246	0.1652
20	PCK1	55573277	rs2179706	INTRONIC	C/T	0.2447	0.1255
20	INTERGENIC	55581782	rs6015032	INTERGENIC	G/A	1.43x10-5	0.0043
20	INTERGENIC	55584143	rs6025639	INTERGENIC	C/T	0.9995	0.9724
20	INTERGENIC	55587305	rs6025642	INTERGENIC	T/G	0.2615	0.7705
20	INTERGENIC	55587441	rs1546913	INTERGENIC	A/G	0.4884	0.9703
20	INTERGENIC	55589409	rs6025643	INTERGENIC	C/T	0.5284	0.3547
20	INTERGENIC	55590747	rs6025645	INTERGENIC	G/A	0.1338	0.9876
20	INTERGENIC	55592682	rs6513317	INTERGENIC	T/C	0.3527	0.6434
20	INTERGENIC	55593756	rs2064393	INTERGENIC	C/T	0.3022	0.2523
20	INTERGENIC	55593981	rs4811880	INTERGENIC	C/T	0.4385	0.3156
20	INTERGENIC	55594125	rs6123708	INTERGENIC	A/C	0.9581	0.7733
20	INTERGENIC	55595004	rs13038139	INTERGENIC	C/T	0.0141	0.0522
20	INTERGENIC	55595537	rs761345	INTERGENIC	G/A	0.0378	0.0643
20	INTERGENIC	55597093	rs4810086	INTERGENIC	A/G	0.8725	0.7432
20	ZBP1	55609667	rs6015040	DOWNSTREAM	C/T	0.3586	0.3171
20	ZBP1	55609940	rs17413414	DOWNSTREAM	A/G	0.2028	0.1227
20	ZBP1	55612828	rs6064572	3PRIME_UTR	C/A	0.3439	0.3473
20	ZBP1	55613281	rs8118279	INTRONIC	A/G	0.9488	0.6169
20	ZBP1	55613969	rs6025653	INTRONIC	G/T	0.0694	0.0384
20	ZBP1	55615355	rs4811887	INTRONIC	A/G	0.0161	0.022
20	ZBP1	55618538	rs742724	INTRONIC	G/A	0.361	0.671
20	ZBP1	55624040	rs2073145	NON_SYNONYMOUS_CODING;SPLICE_SITE	C/T	2.53x10-6	0.0025
20	ZBP1	55628138	rs4811890	INTRONIC	T/C	0.0377	0.3637
20	ZBP1	55632725	rs13042465	UPSTREAM	A/C	0.0003	0.0363
20	ZBP1	55633244	rs4811892	UPSTREAM	T/C	0.0847	0.7777
20	INTERGENIC	55636143	rs6128102	INTERGENIC	C/T	0.1547	0.1597
20	INTERGENIC	55636508	rs17499060	INTERGENIC	T/C	0.1553	0.4849
20	INTERGENIC	55637003	rs17414380	INTERGENIC	C/T	0.893	0.757
20	INTERGENIC	55639435	rs718307	INTERGENIC	G/A	0.0539	0.244
20	INTERGENIC	55639715	rs4811895	INTERGENIC	G/A	0.0151	0.3613
20	INTERGENIC	55641020	rs723295	INTERGENIC	C/T	0.0003	0.062
20	INTERGENIC	55645259	rs6128112	INTERGENIC	T/C	0.0001	0.0244
20	INTERGENIC	55650595	rs6128116	INTERGENIC	G/A	0.0002	0.0284
20	PMEPA1	55656857	rs6025689	3PRIME_UTR	A/G	0.9398	0.9748
20	PMEPA1	55665989	rs927171	INTRONIC	C/A	0.2536	0.5136
20	PMEPA1	55668525	rs427278	INTRONIC	G/T	0.2499	0.6885
20	PMEPA1	55674233	rs169409	INTRONIC	C/T	0.0184	0.0814
20	PMEPA1	55678749	rs13044132	INTRONIC	T/C	0.1207	0.096
20	PMEPA1	55682370	rs157087	INTRONIC	C/A	0.4752	0.5882
