# Supplementary material for: Hippocampal Atrophy as a Quantitative Trait in a Genome-Wide Association Study Identifying Novel Susceptibility Genes for Alzheimer's Disease
Source: PLoS One. 2009 Aug 7;4(8):e6501. doi: 10.1371/journal.pone.0006501 (PMC2719581; doi:10.1371/journal.pone.0006501)
Supplement: Table S20 — Quantitative trait analysis for the interaction between left and right hippocampi for the SNPs and related genes or chromosomal regions listed in Table 3 of the manuscript. The SNP chromosome, gene, base-pair position, rs number, consequence type and SNP alleles are presented. The p-values for the left and right hippocampi indicate the interaction between SNP and diagnosis in explaining the subjects' degree of hippocampal atrophy. (0.04 MB XLS) [file pone.0006501.s040.xls]

## Sheet: FDPSP
Chromosome	Gene	Location	SNP	Consequence_type	Allele	LEFT-P	RIGHT-P
21	INTERGENIC	20590354	rs1028981	INTERGENIC	G/A	0.0305	0.2116
21	INTERGENIC	20592047	rs2826135	INTERGENIC	T/C	0.2088	0.8419
21	INTERGENIC	20595054	rs2826144	INTERGENIC	A/G	0.1846	0.1944
21	INTERGENIC	20598845	rs2032203	INTERGENIC	T/C	0.0414	0.3284
21	INTERGENIC	20598943	rs2826152	INTERGENIC	C/T	0.91	0.3344
21	INTERGENIC	20599964	rs2826156	INTERGENIC	A/C	0.3959	0.984
21	INTERGENIC	20600289	rs2826157	INTERGENIC	T/G	0.1218	0.1761
21	INTERGENIC	20617914	rs11701201	INTERGENIC	G/A	0.9453	0.3126
21	INTERGENIC	20619946	rs2826174	INTERGENIC	C/T	0.0402	0.0626
21	INTERGENIC	20628167	rs2826182	INTERGENIC	G/A	0.0812	0.1078
21	INTERGENIC	20628489	rs2826183	INTERGENIC	C/A	0.917	0.2327
21	INTERGENIC	20630597	rs2826184	INTERGENIC	C/T	0.0623	0.6447
21	INTERGENIC	20630862	rs2826185	INTERGENIC	G/A	0.9454	0.2392
21	INTERGENIC	20633478	rs1386758	INTERGENIC	A/G	0.6382	0.173
21	INTERGENIC	20644492	rs2826197	INTERGENIC	G/A	0.316	0.7091
21	AP001254.2	20649179	rs2826199	UPSTREAM	C/T	0.5722	0.4243
21	AP001254.2	20650723	rs2826203	UPSTREAM	A/C	0.8674	0.6456
21	AP001254.2	20651215	rs2826205	UPSTREAM	A/G	0.5116	0.3493
21	AP001254.2	20652125	rs1011838	UPSTREAM	C/A	0.3277	0.7353
21	AP001254.2	20652664	rs1041789	UPSTREAM	C/T	0.8148	0.5868
21	AP001254.2	20654786	rs1586488	UPSTREAM	T/C	0.3768	0.7308
21	INTERGENIC	20656627	rs2826208	INTERGENIC	A/G	0.1529	0.6286
21	INTERGENIC	20658686	rs2826213	INTERGENIC	C/T	0.1608	0.6535
21	INTERGENIC	20658880	rs1843996	INTERGENIC	G/A	0.3108	0.7358
21	INTERGENIC	20663171	rs9305956	INTERGENIC	C/T	0.401	0.6805
21	INTERGENIC	20664793	rs2032196	INTERGENIC	C/T	0.4133	0.731
21	INTERGENIC	20666759	rs2826219	INTERGENIC	A/G	0.9637	0.5758
21	INTERGENIC	20669129	rs2040250	INTERGENIC	A/G	0.8091	0.7641
21	INTERGENIC	20670572	rs11700900	INTERGENIC	T/C	0.1238	0.6677
21	INTERGENIC	20675442	rs10432923	INTERGENIC	C/T	0.374	0.4755
21	FDPSP	20687064	rs2826225	DOWNSTREAM	G/A	0.2618	0.4921
21	INTERGENIC	20691009	rs2142422	INTERGENIC	T/C	0.7851	0.9871
21	INTERGENIC	20694211	rs2205502	INTERGENIC	T/C	0.3634	0.4325
21	INTERGENIC	20698280	rs874320	INTERGENIC	C/T	0.516	0.9598
21	INTERGENIC	20698949	rs2019116	INTERGENIC	T/C	0.2106	0.0894
21	INTERGENIC	20699601	rs1888414	INTERGENIC	T/C	2.56x10-7	0.0008
21	INTERGENIC	20702049	rs4818568	INTERGENIC	T/C	0.3543	0.8845
21	INTERGENIC	20713786	rs1985053	INTERGENIC	G/A	0.211	0.0828
21	AP001254.2	20714647	rs17791136	DOWNSTREAM	G/A	0.0867	0.0213
21	RPS3AP1	20717946	rs2826245	DOWNSTREAM	T/C	0.1334	0.089
21	RPS3AP1	20723899	rs2178986	UPSTREAM	C/T	0.6002	0.3479
21	RPS3AP1	20725970	rs8133125	UPSTREAM	G/A	0.8461	0.8515
21	RPS3AP1	20728139	rs1786356	UPSTREAM	A/G	0.7597	0.6601
21	INTERGENIC	20733852	rs1735901	INTERGENIC	A/C	0.7313	0.2099
21	INTERGENIC	20734158	rs1786427	INTERGENIC	A/G	0.5862	0.6748
21	INTERGENIC	20734486	rs1735899	INTERGENIC	C/T	0.4246	0.8077
21	INTERGENIC	20734843	rs2989314	INTERGENIC	C/A	0.1021	0.3124
21	INTERGENIC	20735726	rs2407728	INTERGENIC	A/G	0.4163	0.534
21	INTERGENIC	20736495	rs1786434	INTERGENIC	G/A	0.8769	0.3362
21	INTERGENIC	20738449	rs2826254	INTERGENIC	G/A	0.8971	0.9679
21	INTERGENIC	20738680	rs2826255	INTERGENIC	A/G	0.9679	0.7895
21	INTERGENIC	20738797	rs2826256	INTERGENIC	A/C	0.1849	0.6295
21	INTERGENIC	20739696	rs2826259	INTERGENIC	A/G	0.6667	0.6708
21	INTERGENIC	20741268	rs12482709	INTERGENIC	G/A	0.1325	0.3377
21	INTERGENIC	20742279	rs1735884	INTERGENIC	C/T	0.1812	0.3801
21	INTERGENIC	20742953	rs2826261	INTERGENIC	A/G	0.0051	0.171
21	INTERGENIC	20743219	rs1735881	INTERGENIC	C/T	0.7076	0.6216
21	INTERGENIC	20744417	rs1786367	INTERGENIC	A/G	0.7183	0.5417
21	INTERGENIC	20744598	rs1786368	INTERGENIC	G/A	0.7422	0.6556
21	INTERGENIC	20745434	rs1786371	INTERGENIC	T/C	0.7199	0.5735
21	INTERGENIC	20746150	rs1735877	INTERGENIC	C/T	0.4464	0.2961
21	INTERGENIC	20757822	rs2826276	INTERGENIC	A/G	0.3069	0.726
21	INTERGENIC	20766470	rs1735807	INTERGENIC	A/G	0.8433	0.5656
21	INTERGENIC	20767680	rs1735799	INTERGENIC	A/G	0.7275	0.5772
21	INTERGENIC	20768335	rs2826287	INTERGENIC	A/C	0.6655	0.6284
21	INTERGENIC	20768504	rs2826288	INTERGENIC	A/G	0.6791	0.6605
21	INTERGENIC	20773757	rs990241	INTERGENIC	A/G	0.8179	0.6697
21	INTERGENIC	20774036	rs2826301	INTERGENIC	G/A	0.0438	0.2623
21	INTERGENIC	20774567	rs1735876	INTERGENIC	C/T	0.5665	0.4528
21	INTERGENIC	20774649	rs1735874	INTERGENIC	A/G	0.5522	0.4303
21	INTERGENIC	20774840	rs2826303	INTERGENIC	A/G	0.5015	0.717
21	INTERGENIC	20776315	rs2826310	INTERGENIC	C/T	0.7928	0.662
21	INTERGENIC	20778532	rs2826319	INTERGENIC	A/G	0.5936	0.3653
21	INTERGENIC	20779301	rs2826320	INTERGENIC	T/C	0.4286	0.1937
21	INTERGENIC	20782918	rs2826324	INTERGENIC	C/T	0.2395	0.4618
